# Supplementary material for: 1,3,6-Trigalloylglucose: A Novel Potent Anti-Helicobacter pylori Adhesion Agent Derived from Aqueous Extracts of Terminalia chebula Retz
Source: MDPI journal article supplement (doi:10.3390/molecules29051161), 2024-03-05

Figure S1: the information of compound 3 by NMR analysis

HP001

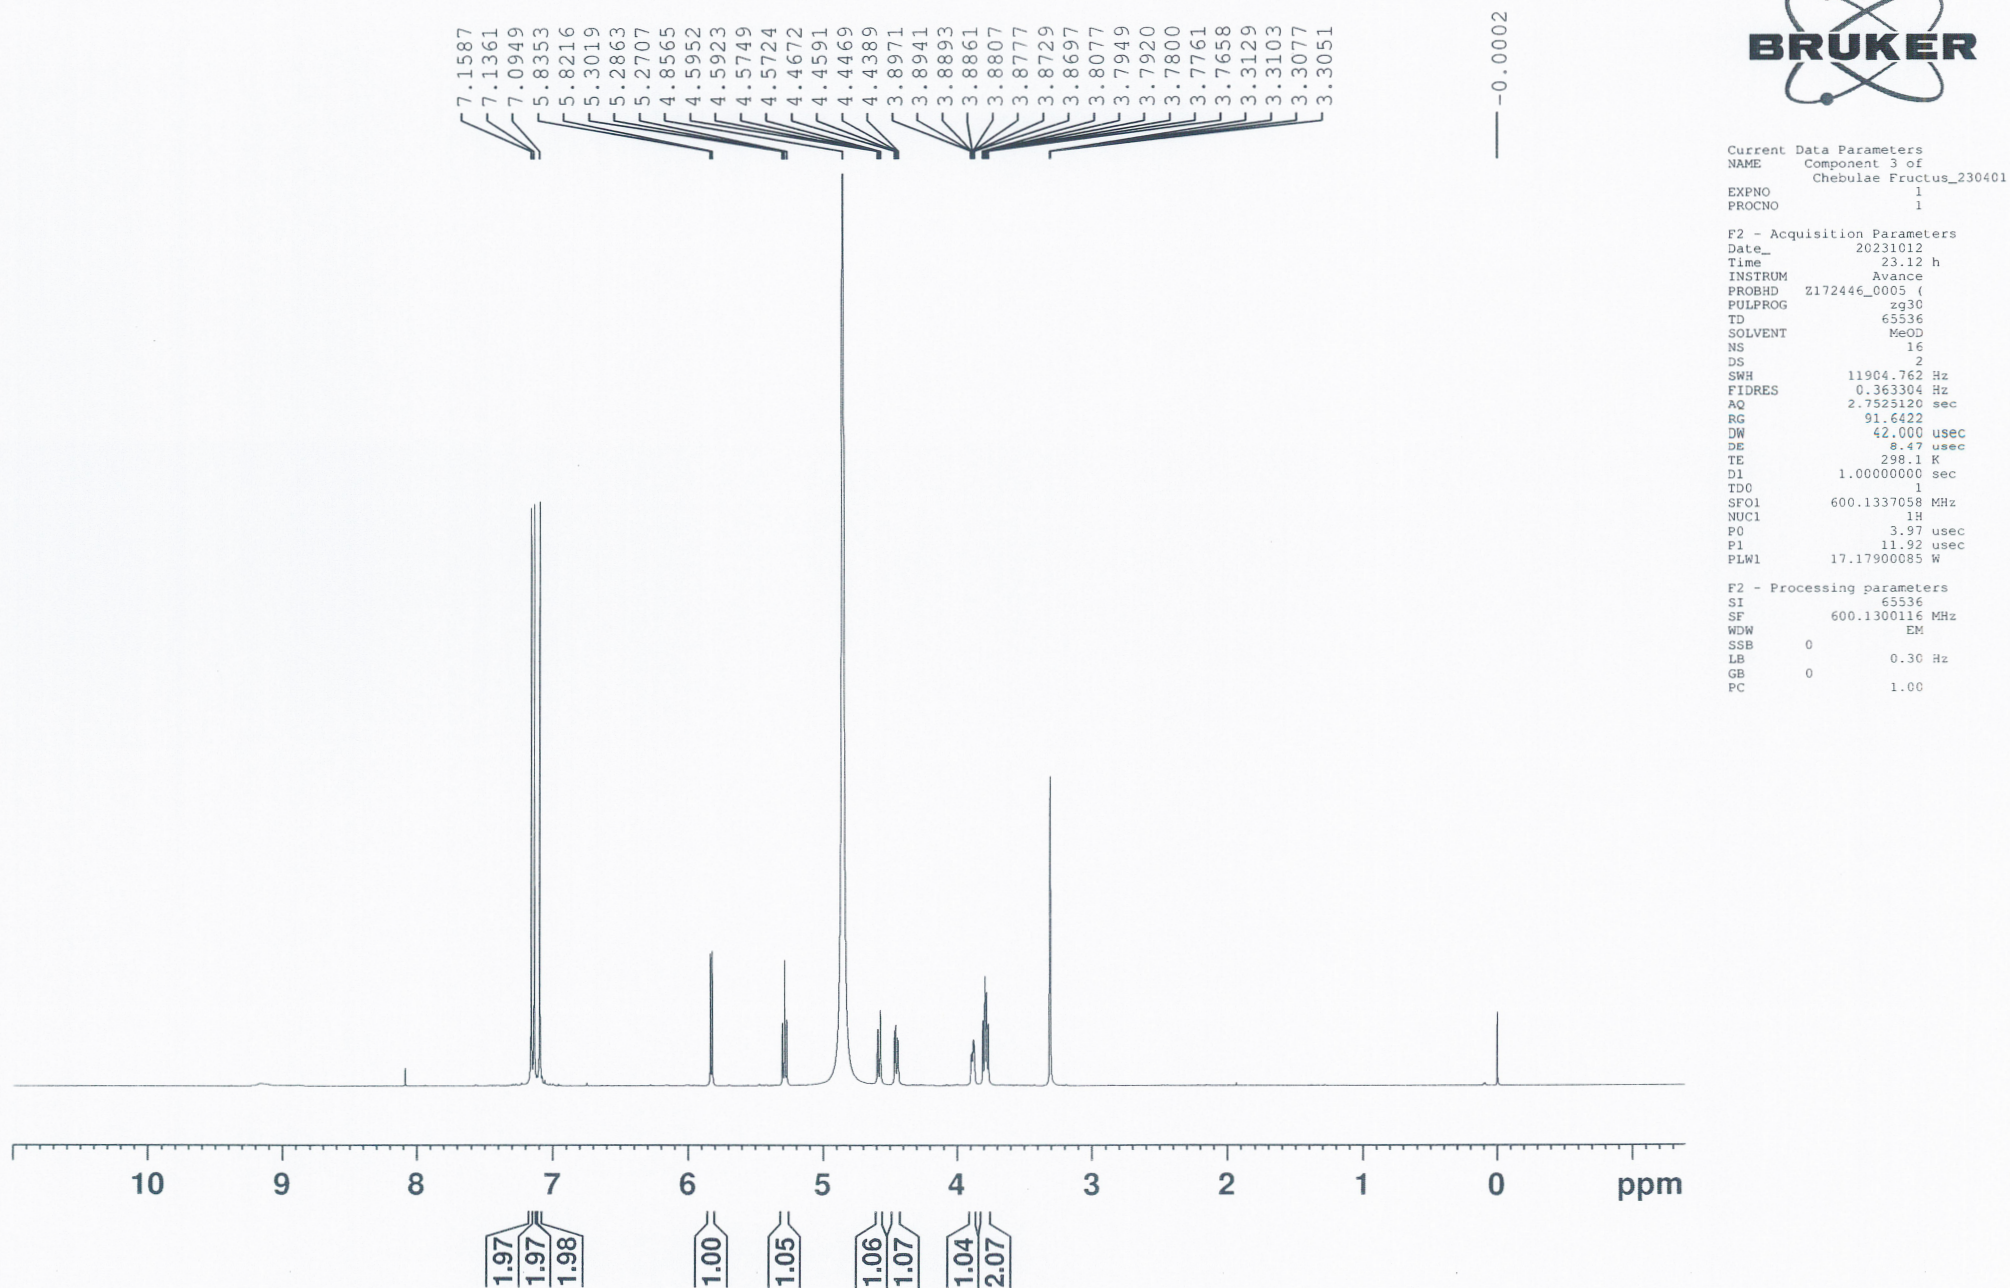



HP001

7.1587  
7.1361  
7.0949

5.8353  
5.8216

5.3019  
5.2863  
5.2707

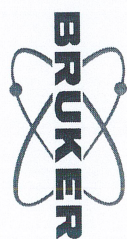

Current Data Parameters  
NAME Component 3 of  
Chebulae Fructus\_230401

EXPNO 1  
PROCNO 1

F2 - Acquisition Parameters  
Date\_ 2012112  
Time\_ 2112

INSTRUM Avance  
PROBHD 2172446\_0005 (

PULPROG zg30  
TD 65536

SOLVENT MeOD  
NS 16

DS 11904.762 Hz  
SWH 10353.064 Hz

FIDRES 2.7525120 sec  
RG 91.6422

DE 42.000 usec  
TE 298.1 K

D1 1.00000000 sec  
D10

SFO1 600.1337058 MHz  
SF 600.1337058 MHz

PC 3.97 usec  
PL 11.92 usec

PLW1 17.17900085 W

F2 - Processing Parameters  
SI 65536  
SF 600.1300116 MHz

WDW EM  
SSB 0

GB 0.30 Hz  
PC 1.00

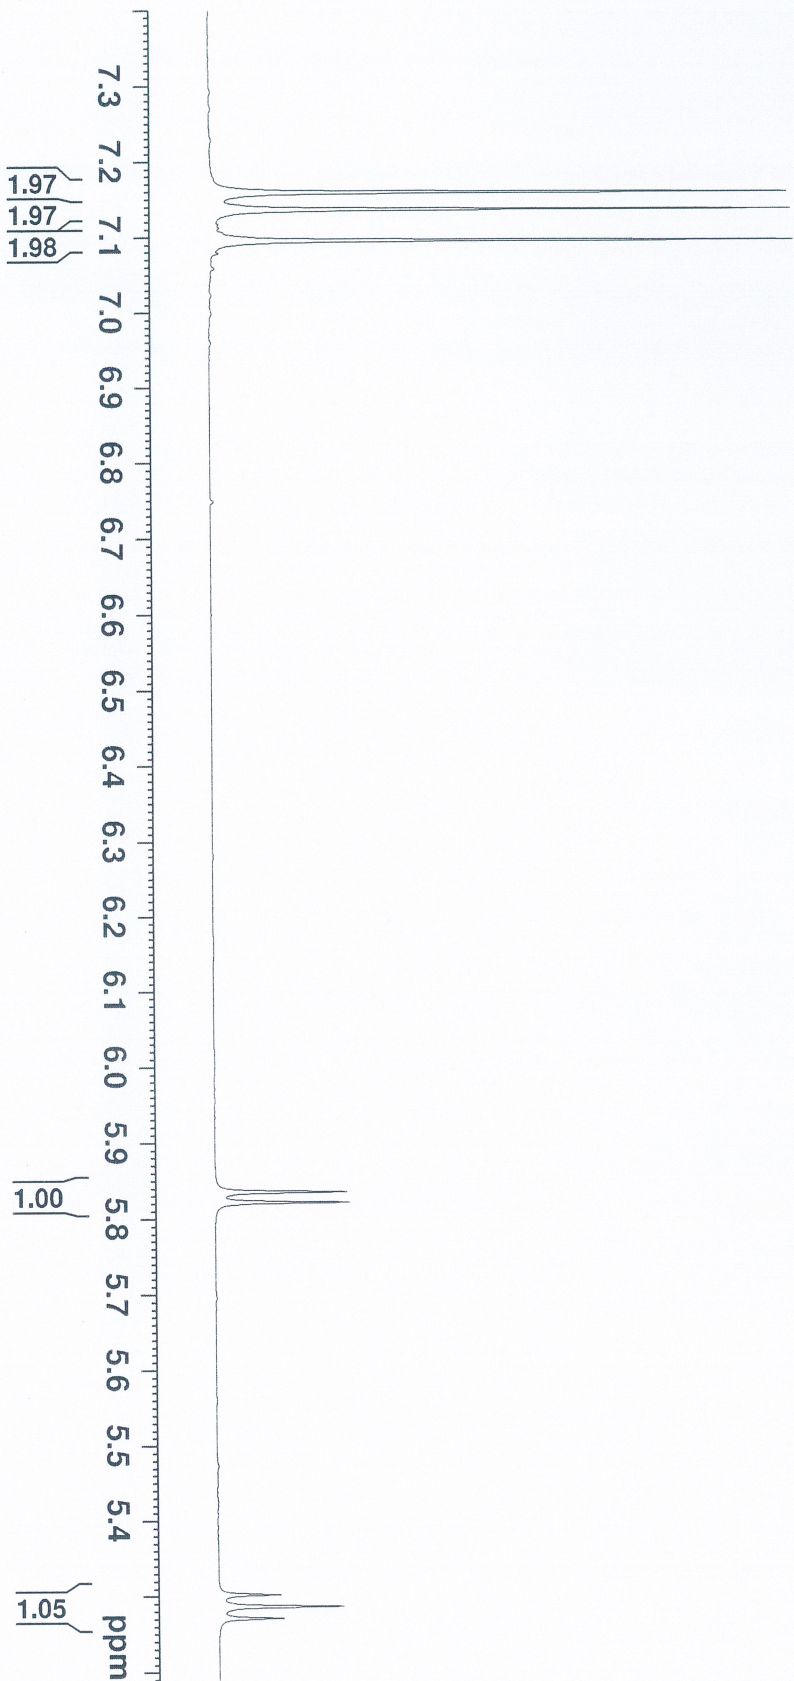



HP001

4.5952  
4.5923  
4.5749  
4.5724

4.4672  
4.4591  
4.4469  
4.4389

3.8971  
3.8941  
3.8893  
3.8861  
3.8807  
3.8777  
3.8729  
3.8697  
3.8077  
3.7949  
3.7920  
3.7800  
3.7761  
3.7658

4.6  
1.06

4.5  
1.07

3.9  
1.04

3.8  
2.07  
ppm

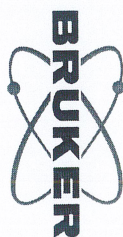

Current Data Parameters  
NAME Composite\_Fucius\_230401  
EXPNO 1  
PROCNO 1

F2 - Acquisition Parameters  
Date\_ 20231012  
Time 23.12 h  
INSTRUM spect  
PROBHD Z172446\_00330  
PULPROG zgpg30  
TD 65536  
SOLVENT MeOD  
NS 16  
DS 2  
SWH 11904.762 Hz  
FIDRES 0.363304 Hz  
AQ 2.7523120 sec  
RG 91.6402  
DM 42.000 usec  
DE 6.447 usec  
TE 298.1 K  
D1 1.00000000 sec  
TD0 1  
SFO1 600.1337058 MHz  
NUC1 1H  
P0 3.97 usec  
P1 1.92 usec  
PL1 17.17900085 W  
F2 - Processing parameters  
SI 65536  
SF 600.1300116 MHz  
WDW EM  
SSB 0  
LB 0.30 Hz  
GB 0  
PC 1.00



HP001

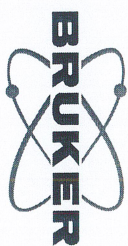

168.27  
168.17  
166.88  
  
146.56  
146.52  
146.46  
140.51  
139.94  
139.83  
  
121.66  
121.31  
120.53  
110.65  
110.45  
110.25  
  
95.92  
  
78.97  
76.45  
72.67  
69.75  
64.27  
49.49  
49.34  
49.20  
49.06  
48.92  
48.77  
48.63  
  
-0.00

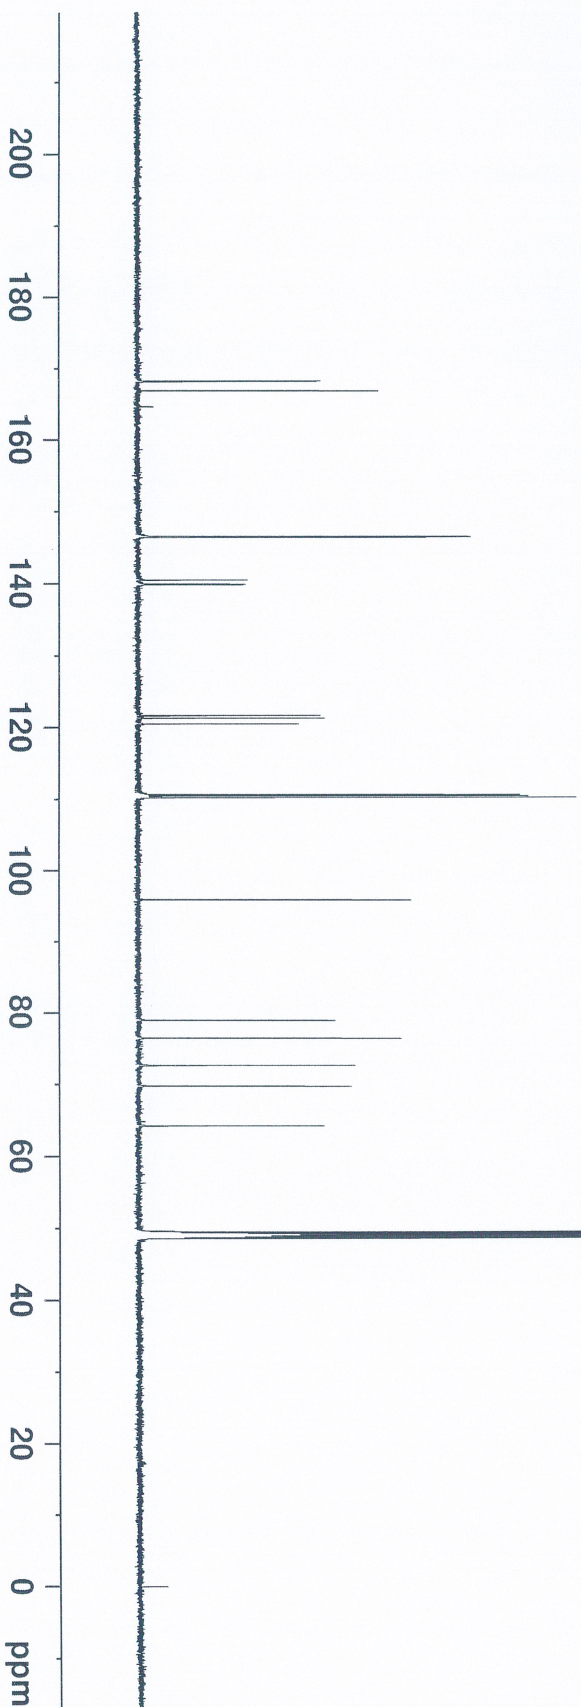

Current Data Parameters  
NAME Component 3 of 3  
Chebulae Fructus\_230401  
EXPNO 1  
PROCNO 2  
F2 - Acquisition Parameters  
Date\_ 20231013  
Time 5.53 h  
INSTRUM Avance  
PROBHD 217246.3005 (1  
PULPROG zgpg30  
TD 65536  
FIDRES 0.2505999 W  
SOLVENT MeOD  
NS 8000  
DS 4  
SWH 35714.283 Hz  
FIDRES 0.10694144 Hz  
AQ 0.9175040 sec  
RG 101  
DW 14.000 usec  
DE 9.50 usec  
TE 300.2 K  
D1 2.0000000 sec  
D11 0.03000000 sec  
TD0 1  
SF01 150.9178988 MHz  
NUC1 13C  
P1 3.50 usec  
PI 11.80 usec  
PLM1 86.66300201 W  
SF02 600.1324005 MHz  
NUC2 1H  
PCPD 70.00 usec  
PLM2 17.17900085 W  
PLM12 0.49814001 W  
PLM13 0.2505999 W  
F2 - Processing Parameters  
SI 32768  
SF 150.9025931 MHz  
WDW EM  
SSB 0  
LB 1.00 Hz  
GB 0  
PC 1.40



HP001

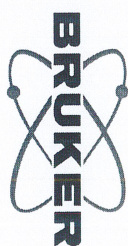

168.27  
168.17  
166.88

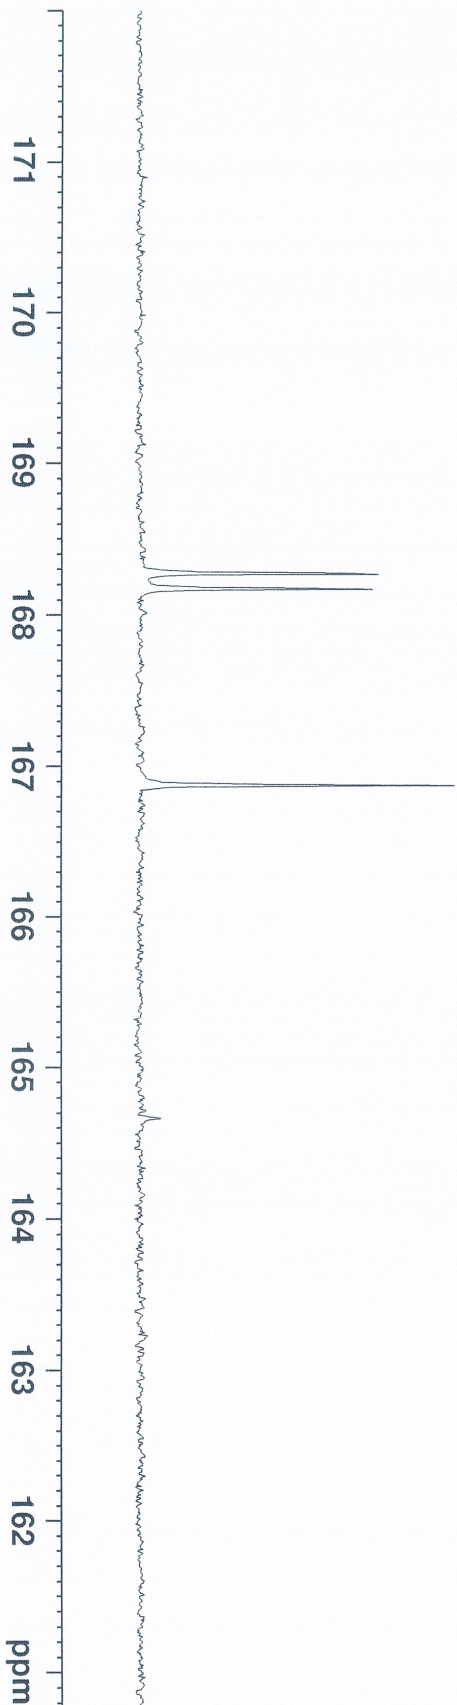

Current Data Parameters  
NAME CHEBULOS Fructus\_230401  
EXPNO 2  
PROCNO 1  
F2 - Acquisition Parameters  
Date\_ 20231013  
Time 5.53 h  
INSTRUM Avance  
PROBHD 217246.005 (1  
PULPROG zgpg30  
TD 65536  
SOLVENT MeOD  
NS 8000  
DS 4  
SWH 35714.285 Hz  
FIDRES 1.000000 Hz  
AQ 0.9179240 sec  
RG 101  
DW 14.000 usec  
DE 6.50 usec  
TE 300.2 K  
D11 2.000000 sec  
D11 0.0300000 sec  
T00 1  
SFO1 150.917898 MHz  
NUC1 13C  
P1 3.00 usec  
PL1 0.00 dB  
SFO2 86.65300201 W  
PLW1 0.00 dB  
SFO2 600.1324005 MHz  
NUC2 1H  
CDEPRG12 waltz16  
PL12 17.1700085 W  
PLW12 0.49814001 W  
PLW13 0.25055999 W  
F2 - Processing parameters  
SI 32768  
SF 150.9025931 MHz  
WDW EM  
SSB 0  
LB 1.00 Hz  
GB 0  
PC 1.40



HP001

146.56  
146.52  
146.46

140.51  
139.94  
139.83

147  
146  
145  
144  
143  
142  
141  
140  
ppm

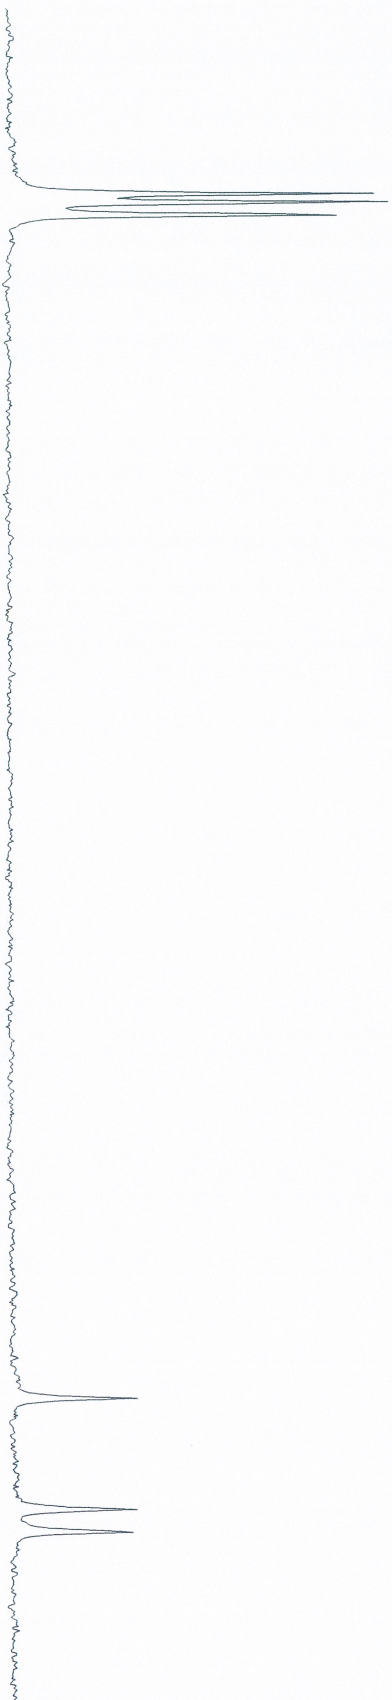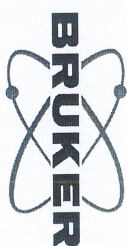

Current Data Parameters  
NAME Component 3 of 3  
Chebulae Fructus\_230401  
EXPNO 2  
PROCNO 1  
F2 - Acquisition Parameters  
Date\_ 20231013  
Time 5.53 h  
INSTRUM Avance  
PROBHD Z17246\_20030  
PULPROG zgpg30  
TD 65536  
FIDRES 0.9175040 sec  
AQ 0.9175040 sec  
RG 101  
DE 14.000 usec  
TE 298.15 K  
D1 2.0000000 sec  
D11 0.0300000 sec  
TDO 1  
STO1 150.917698 MHz  
NUC1 13C  
P1 3.93 usec  
SFO2 600.1324005 MHz  
PLM1 86.66300201 W  
NO2 200304012  
PCPD2 70.00 usec  
PLM2 17.17900085 W  
PLM12 0.49814001 W  
PLM13 0.25055999 W  
F2 - Processing parameters  
SI 32768  
SF 150.9025931 MHz  
WDW EM  
SSB 0  
GB 0  
PC 1.40



HP001

121.66  
121.31  
120.53

110.65  
110.45  
110.25

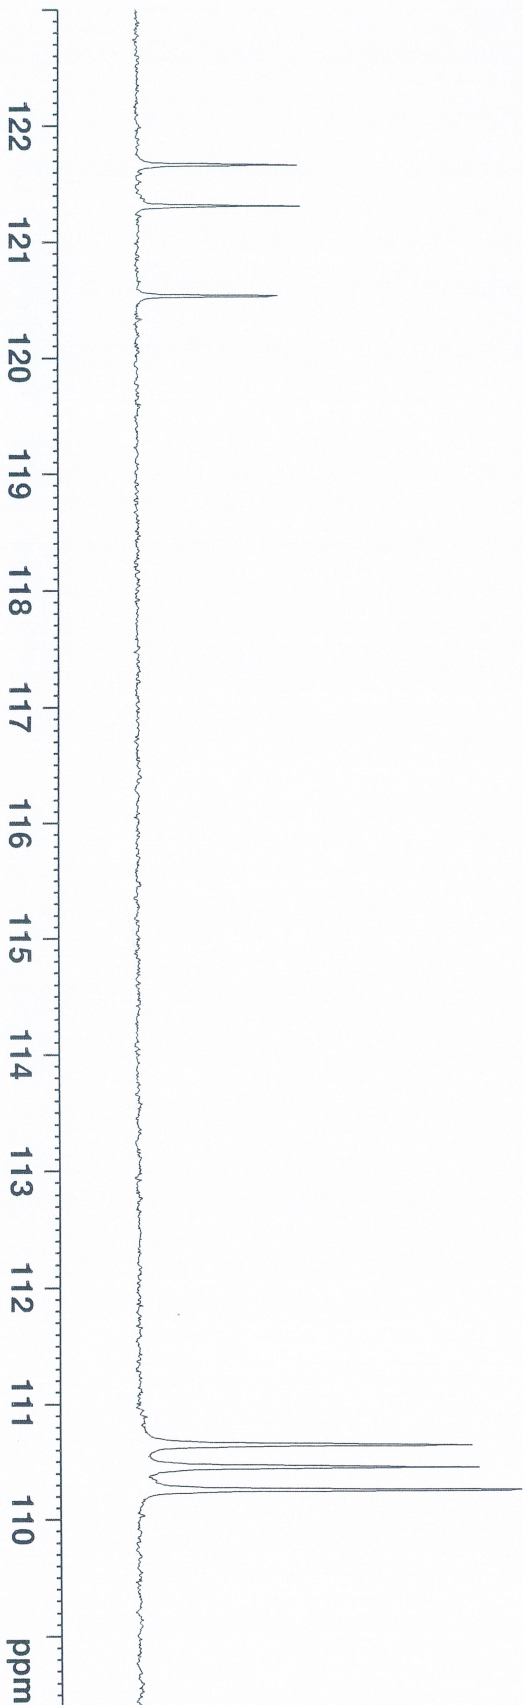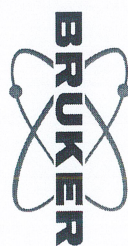

Current Data Parameters  
NAME Chebulae Fructus\_230401  
EXNO 2  
PROCNO 1  
F2 - Acquisition Parameters  
Date\_ 20231013  
Time 5.53 h  
INSTRUM Avance  
PROBHD 2172445\_0005 (1H/13C) QNP  
PULPROG zgpg30  
SOLVENT MeOD  
NS 8000  
DS 4  
SWH 35714.285 Hz  
FIDRES 110.000 Hz  
AQ 0.9175040 sec  
RG 101  
DE 14.000 usec  
TE 300.2 K  
D11 2.0000000 sec  
TD0 0.0300000 sec  
SFO1 150.9178988 MHz  
NUC1 13C  
P1 3.00 usec  
PL1 11.80 usec  
SFO2 600.1324005 MHz  
NUC2 1H  
CDEPRG12 waltz16  
PL12 17.17900085 W  
PLW2 0.49814001 W  
PLW3 0.25055999 W  
F2 - Processing Parameters  
SI 32768  
SF 150.9025931 MHz  
WDW EM  
SSB 0  
LB 1.00 Hz  
GB 0  
PC 1.40



HP001

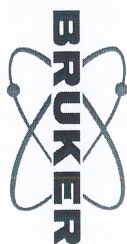

95.92  
78.97  
76.45  
72.67  
69.75  
64.27

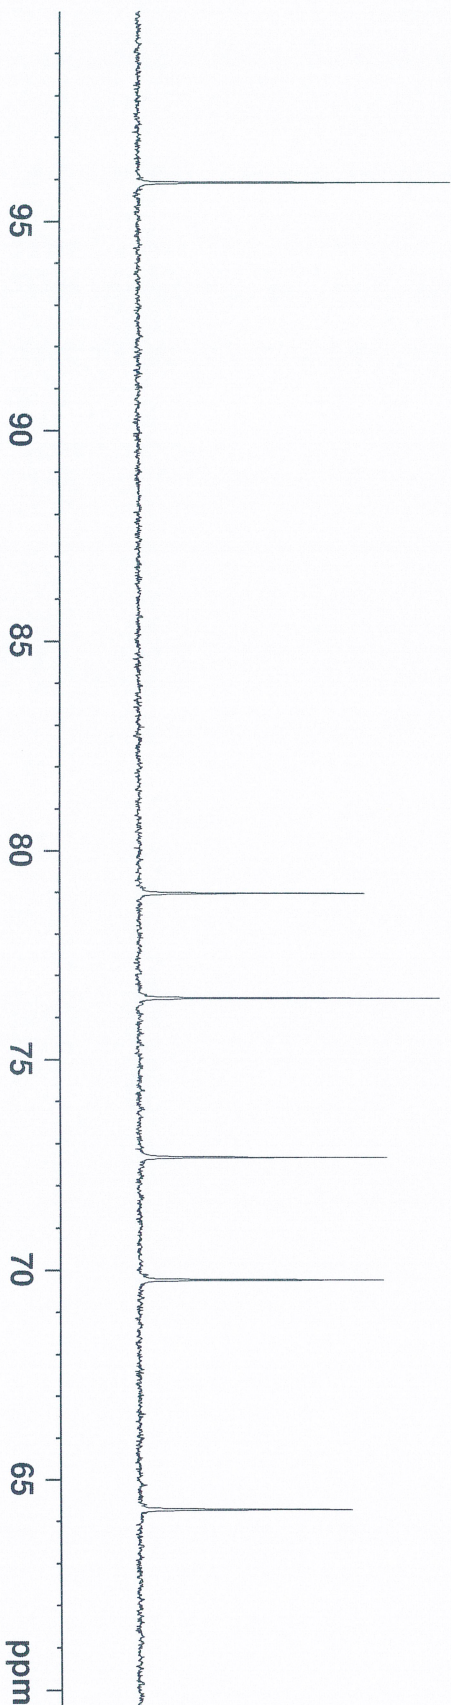

Current Data Parameters  
NAME Component 3 of  
Cinepluaa Fructus\_230401  
EXPNO 2  
PROCNO 1  
F2 - Acquisition Parameters  
Date\_ 20231013  
Time 5.53 h  
INSTRUM Avance  
PROBHD 21/246.005 (1  
PULPROG zgpg30  
TD 65536  
FIDRES 0.000180  
SOLVENT MeOD  
NS 8000  
DS 4  
SWH 35714.283 Hz  
FIDRES 0.000180 Hz  
AQ 0.9175040 sec  
RG 101  
DE 14.000 usec  
TE 300.2 K  
D1 2.0000000 sec  
D11 0.0300000 sec  
TDO 1  
SFO1 150.9178988 MHz  
NUC1 13C  
P1 3.93 usec  
PI 11.80 usec  
PLM1 86.66300201 W  
SFO2 600.1324005 MHz  
NO2 150.9178988 MHz  
P2 3.93 usec  
PI 11.80 usec  
PLM2 17.17900085 W  
PCPD 70.00 usec  
PLM3 0.25055999 W  
F2 - Processing Parameters  
SI 32768  
SF 150.9025931 MHz  
WDW EM  
SSB 0  
GB 1.00 Hz  
CB 0  
PC 1.40



HP001

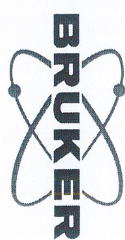

Current Data Parameters  
NAME Component 3 of 3  
Chebulae Fructus\_230401  
EXPNO 1  
PROCNO 1

F2 - Acquisition Parameters

Date\_ 20230113  
Time 9.12 h  
PULPROG zgpg30  
PROBHD 5mm QNP 1H/13C  
PULPROG zgpg30  
TD 65536  
SOLVENT MeOD  
NS 4000  
DS 8  
SWH 35714.285 Hz  
FIDRES 1.08913 Hz  
AQ 0.9175040 sec  
RG 101  
DM 14.00 usec  
DE 6.50 usec  
TE 298.2 K  
CNST2 145.0000000  
D1 2.0000000 sec  
D2 0.00344828 sec  
D12 0.0002000 sec  
TD0 1  
SFO1 150.9178988 MHz  
NUC1 13C  
P1 11.80 usec  
F13 2000.00 usec  
P13 0 W  
SFO2 600.1324005 MHz  
NUC2 1H  
SFO3 400.1463000 MHz  
NUC3 13C  
SFO4 101.3254180 MHz  
NUC4 1H  
SFO5 0 Hz  
SPW5 18.43700027 W  
SFO2 600.1324005 MHz  
NUC2 1H  
CPDPRG12 waltz65  
P3 11.92 usec  
P4 23.84 usec  
PCPD2 70.00 usec  
PLW2 17.17900085 W  
PLM12 0.49614001 W

F2 - Processing Parameters

SF 12768  
WDW EM  
SSB 0  
LB 1.00 Hz  
GB 0  
PC 1.40

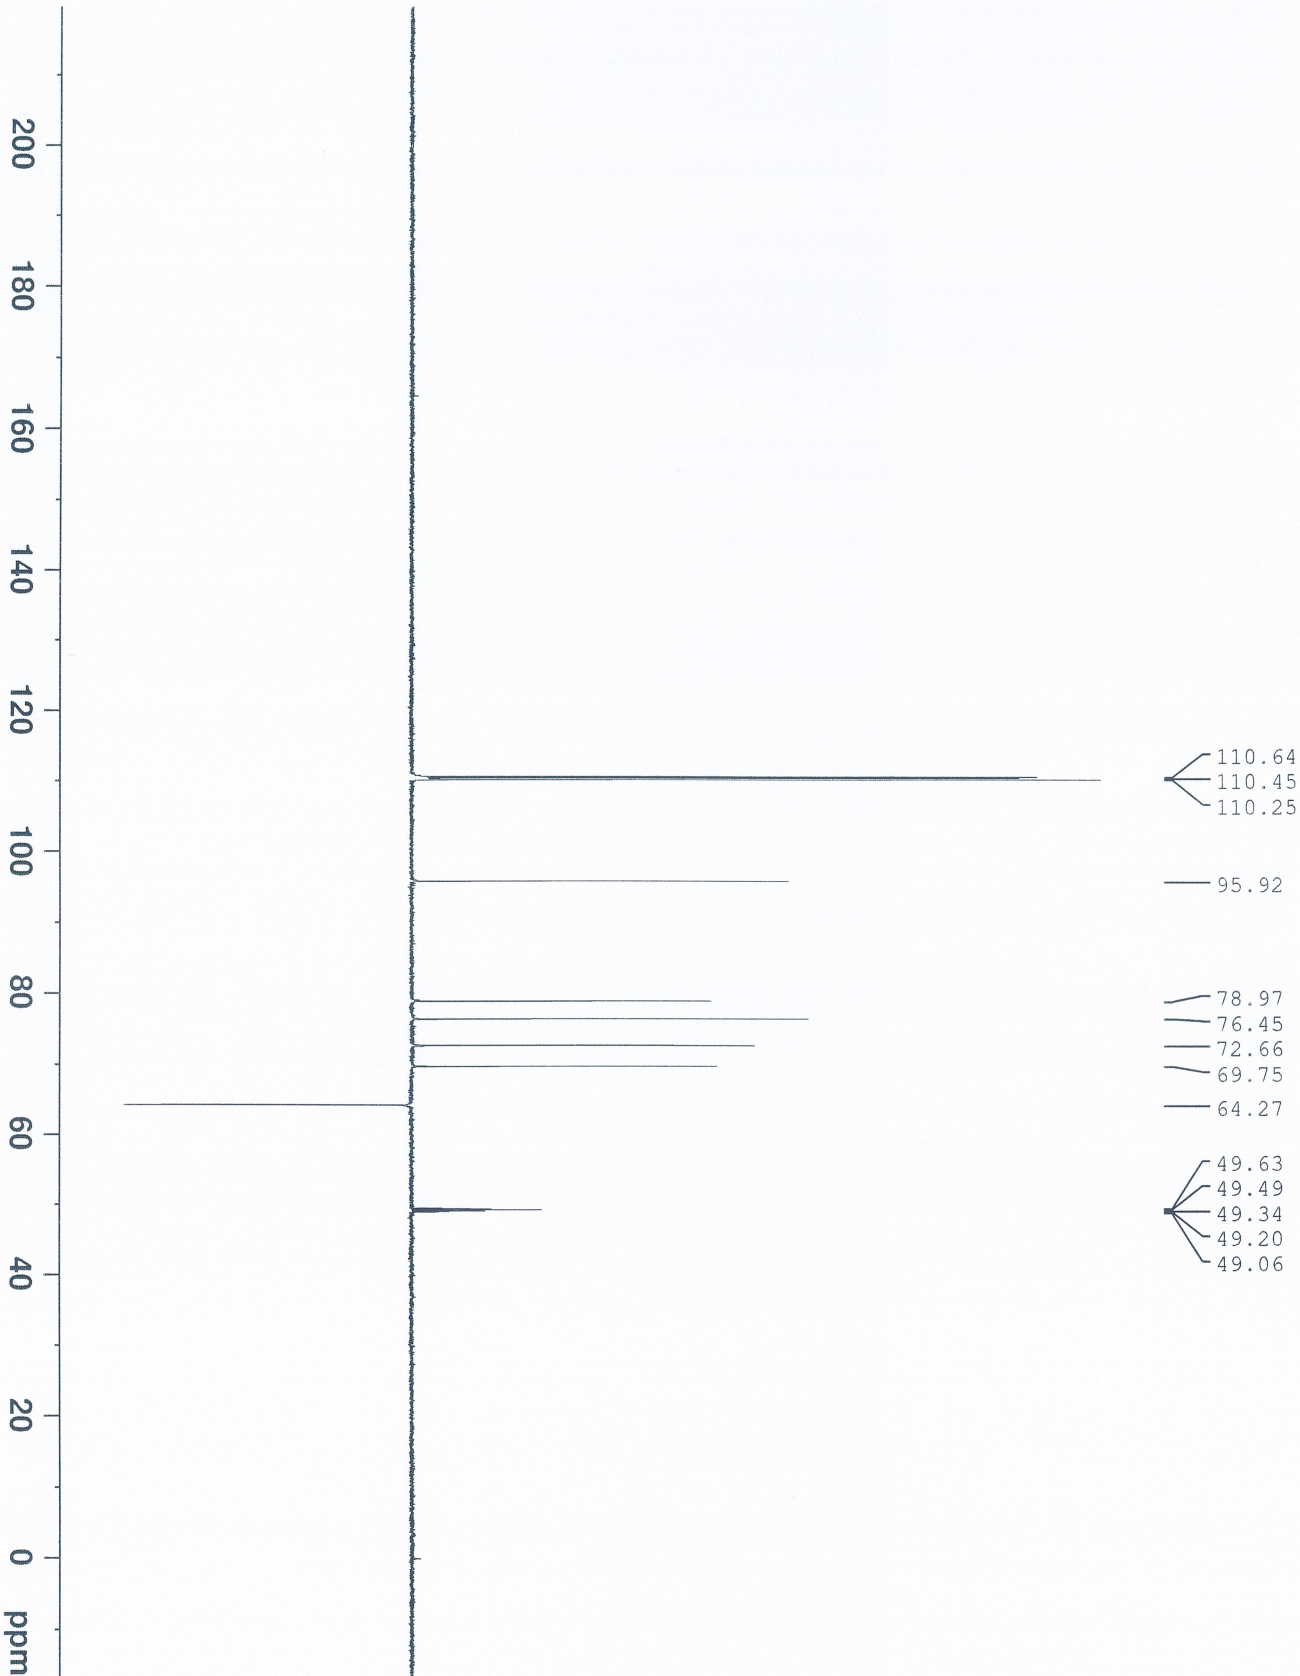



HP001

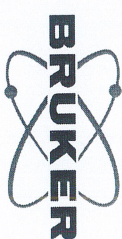

110.64  
110.45  
110.25

95.92

114 112 110 108 106 104 102 100 98 96 ppm

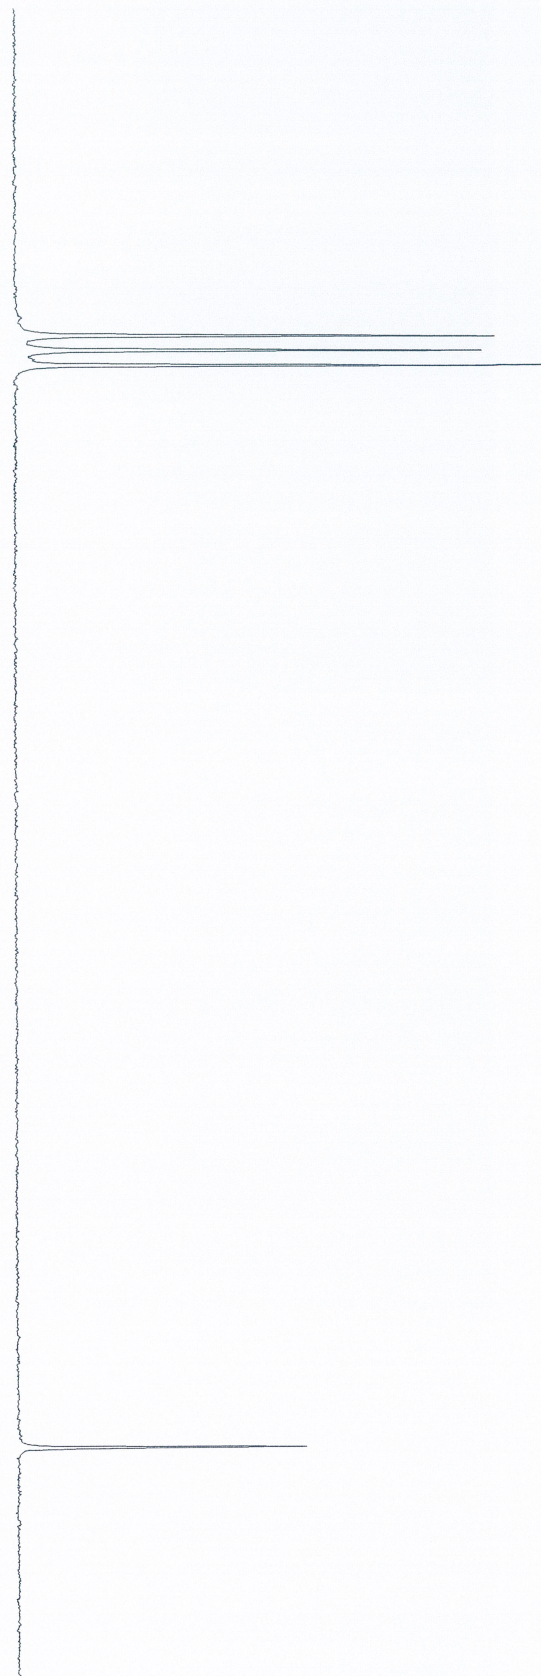

Current Data Parameters  
NAME Component 3 of 3  
CHEMNAME Chebulae Fructus\_230401  
EXPNO 1  
PROCNO 3

F2 - Acquisition Parameters  
Date\_ 20231013  
Time 9.12 h

INSTRUM Avance  
PROBHD 2172446.0005 (1  
PULPROG zgpg30  
TD 65536  
SOLVENT MeOD  
NS 4000  
DS 8  
SWH 35714.285 Hz  
FIDRES 1.08913 Hz  
AQ 0.9175101 sec  
RG 14.000 usec  
DE 6.50 usec  
TE 298.2 K  
CNS12 145.0000000  
D1 2.00000000 sec  
D2 0.00344828 sec  
D12 0.0002000 sec  
TD0 1  
SFO1 150.9178988 MHz  
NUC1 13C  
P1 11.20 usec  
F1 13  
PI13 2000.00 usec  
P1M0 86.66300201 W  
SPNAM[5] Crp60comp.4  
SFO15 0.500  
SFOFFS5 0 Hz  
SPW5 18.43700027 W  
SFO2 600.1324005 MHz  
NUC2 1H  
CPDPRG12 waltz65  
P3 11.22 usec  
P4 2.00 usec  
PCPD2 70.00 usec  
F1M2 17.17900085 W  
P1M12 0.49814001 W

F2 - Processing parameters  
SI 32768  
SF 150.9025931 MHz  
WDW EM  
SSB 0  
LB 1.00 Hz  
GB 0  
PC 1.40



HP001

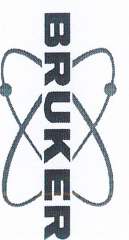

— 78.97  
— 76.45  
— 72.66  
— 69.75  
— 64.27

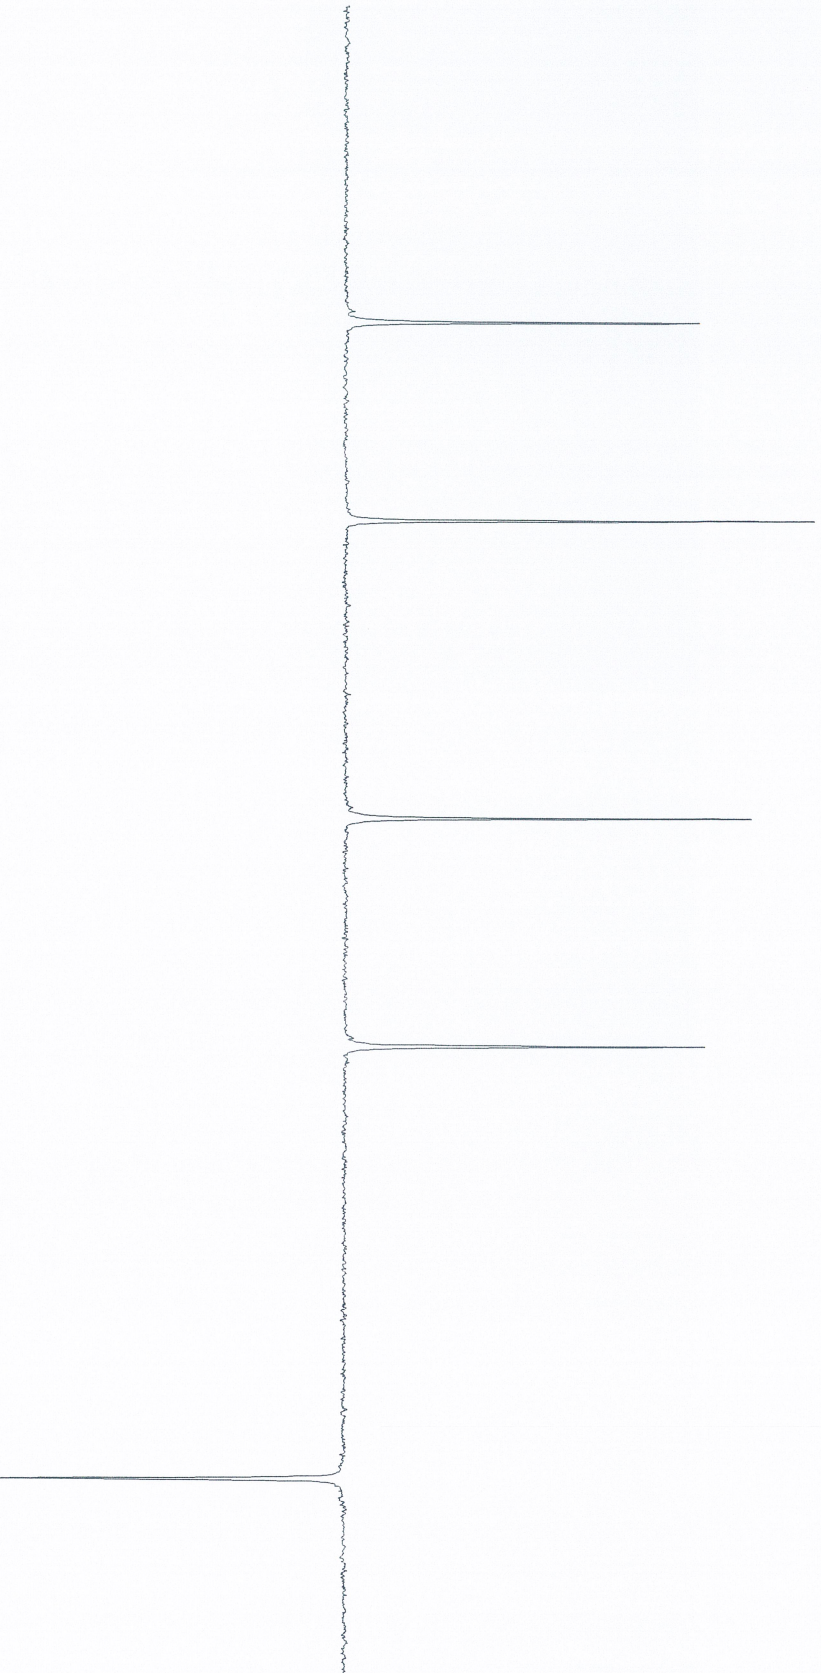

Current Data Parameters  
NAME Component 3 of 3  
EXPNO 3  
PROCNO 1

F2 - Acquisition Parameters

Date\_ 20231013  
Time 9.12 h  
INSTRUM Avance  
PROBHD 2172446\_C0035  
PULPROG zgpg30  
TD 65536  
SOLVENT MeOD  
NS 4000  
DS 8  
SWH 35714.285 Hz  
FIDRES 1.08913 Hz  
AQ 0.9175040 sec  
RG 101  
DM 14.000 usec  
DE 28.30 usec  
TE 300.2 K  
CNS12 145.0000000  
D1 2.00000000 sec  
D2 0.00344828 sec  
TD0 0.00002000 sec  
SFO1 150.9178988 MHz  
NUC1 13C  
P1 11.80 usec  
P13 2000.00 usec  
PLM0 0 W  
PLM1 86.66300201 W  
SFO11 600.1324005 MHz  
SFO12 18.43700027 W  
SFO13 0 Hz  
SFO14 0.500  
SFO15 0 Hz  
SFO16 600.1324005 MHz  
SFO17 1H  
SFO18 11.92 usec  
SFO19 23.84 usec  
SFO20 70.00 usec  
SFO21 17.17900085 W  
SFO22 0.49814001 W  
SFO23 1.40

F2 - Processing parameters  
SI 32768  
SF 150.9025931 MHz  
WDW EM  
SSB 0  
LB 1.00 Hz  
GB 0  
PC 1.40

82 81 80 79 78 77 76 75 74 73 72 71 70 69 68 67 66 65 64 ppm



HP001

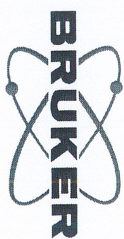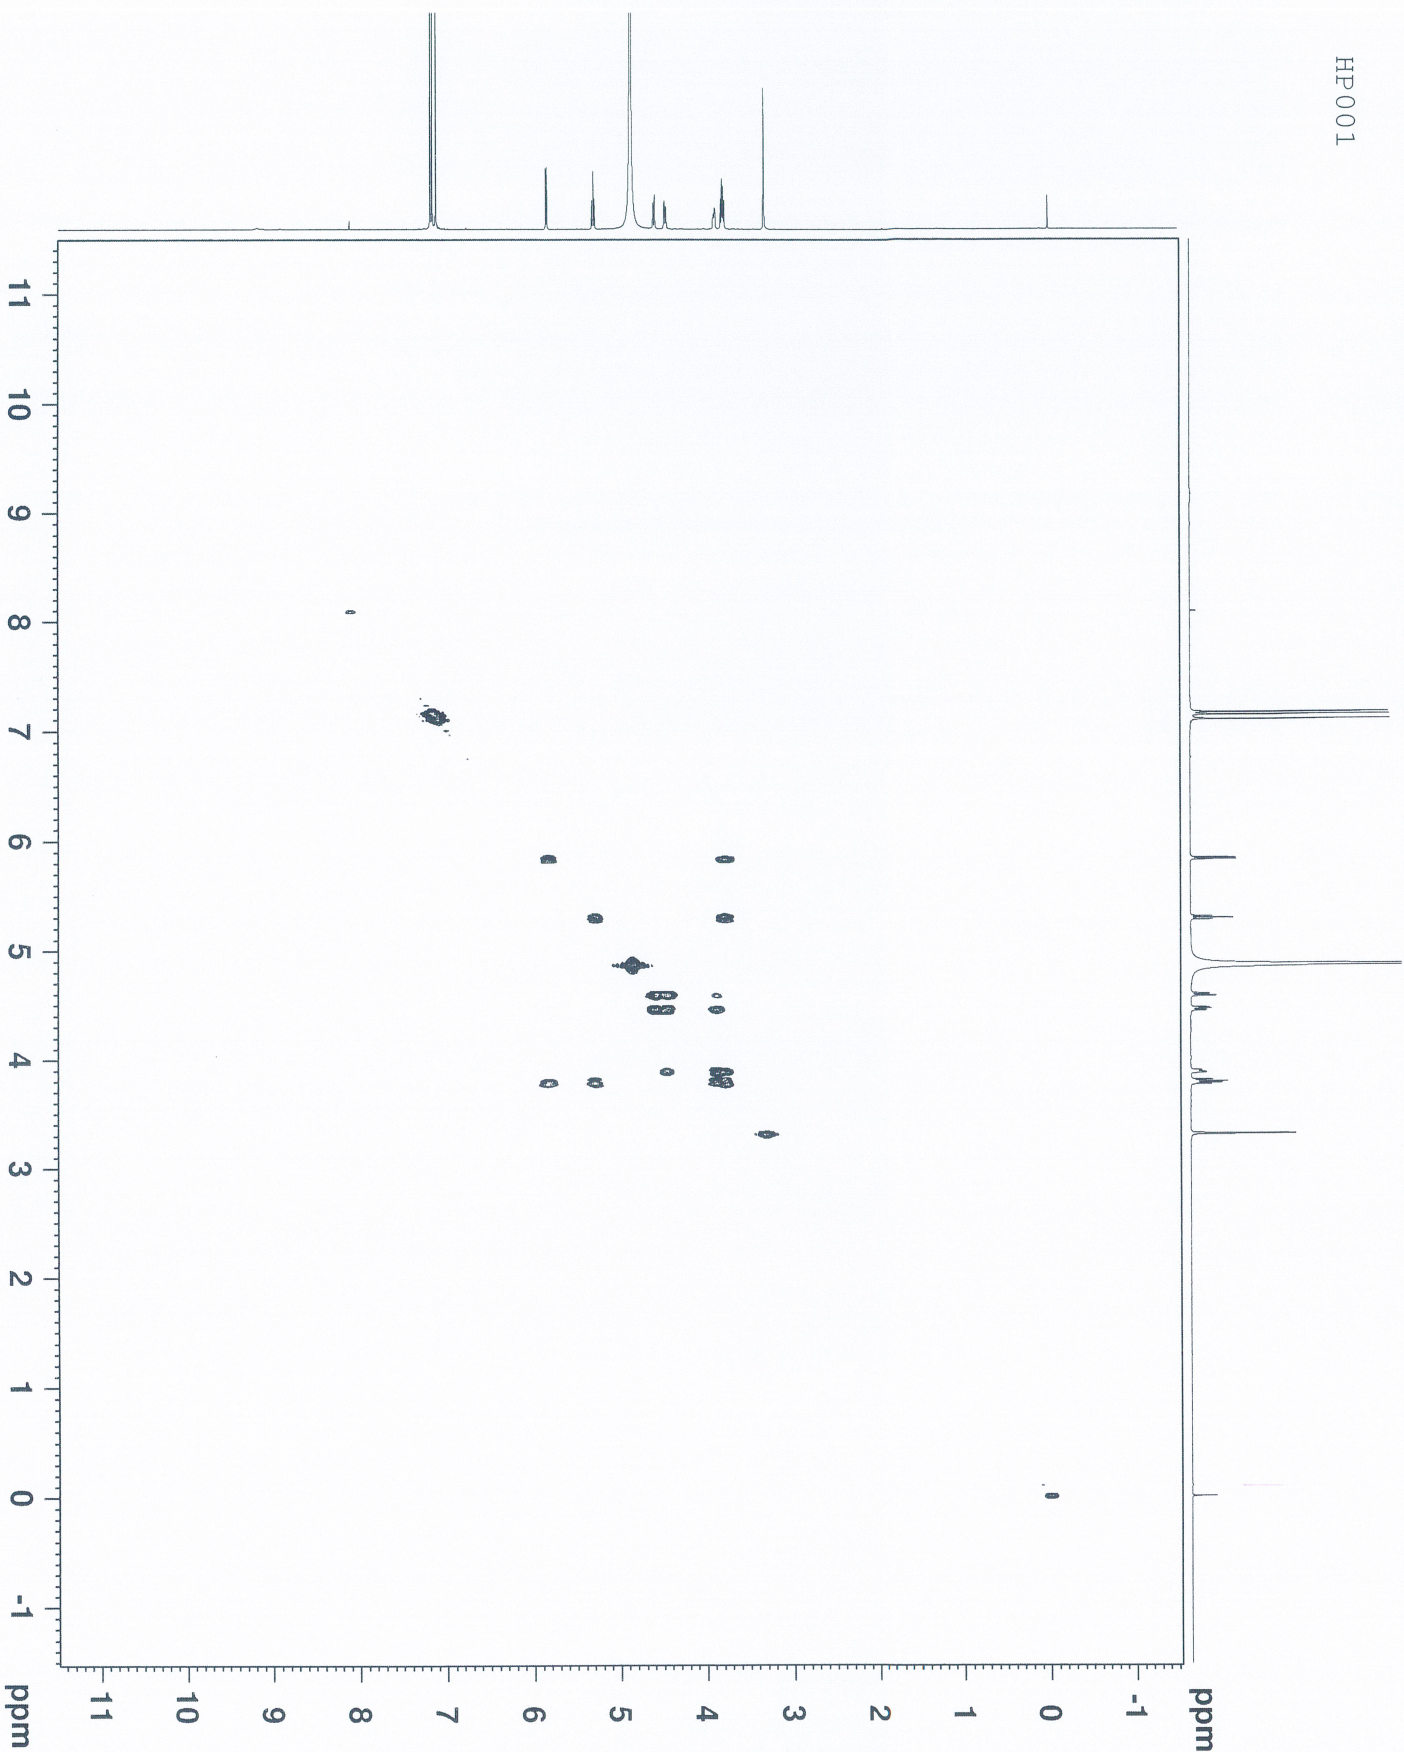

Current Data Parameters  
 Name: Component 3 of Chebulae Fructus\_230401  
 EXPNO: 1  
 PROCNO: 1  
 F2 - Acquisition Parameters  
 Date\_: 20231013  
 Time: 9:29 h  
 Instrument: spect  
 PROBD: 2172446.0005  
 PULPROG: cosypppgp  
 TD: 2048  
 SOLVENT: MeOD  
 NS: 16  
 DS: 16  
 SWH: 7812.500 Hz  
 FIDRES: 7.629395 Hz  
 AQ: 0.1310720 sec  
 RG: 64.000  
 SFO1: 600.130036 MHz  
 DE: 6.50 usec  
 TE: 298.1 K  
 D0: 0.0000300 sec  
 D1: 0.0300000 sec  
 D12: 0.0002000 sec  
 D13: 0.0000400 sec  
 D16: 0.0002000 sec  
 TRO: 0.0012800 sec  
 SFO1: 600.130036 MHz  
 NUC1: 1H  
 P0: 11.92 usec  
 P1: 1.00 usec  
 P2: 250.00 usec  
 PLW1: 17.1700085 W  
 PLW0: 3.9054000 W  
 GPMW(1): SMO10.100  
 GZ1: 10.00 %  
 P16: 1000.00 usec  
 F1 - Acquisition Parameters  
 TD: 128  
 SFO1: 600.133 MHz  
 FIDRES: 122.07013 Hz  
 SFO2: 125.76133 MHz  
 PULPROG: FPMORE  
 F2 - Processing parameters  
 SI: 32768  
 SF: 600.130116 MHz  
 DSF: 4  
 SSB: 0  
 LB: 0 Hz  
 GB: 0  
 PC: 1.40  
 F1 - Processing parameters  
 SI: 1024  
 MC2: CF  
 SF: 600.130116 MHz  
 DSF: 4  
 SSB: 0  
 LB: 0 Hz  
 GB: 0



HP001

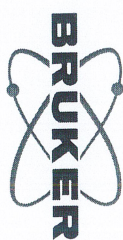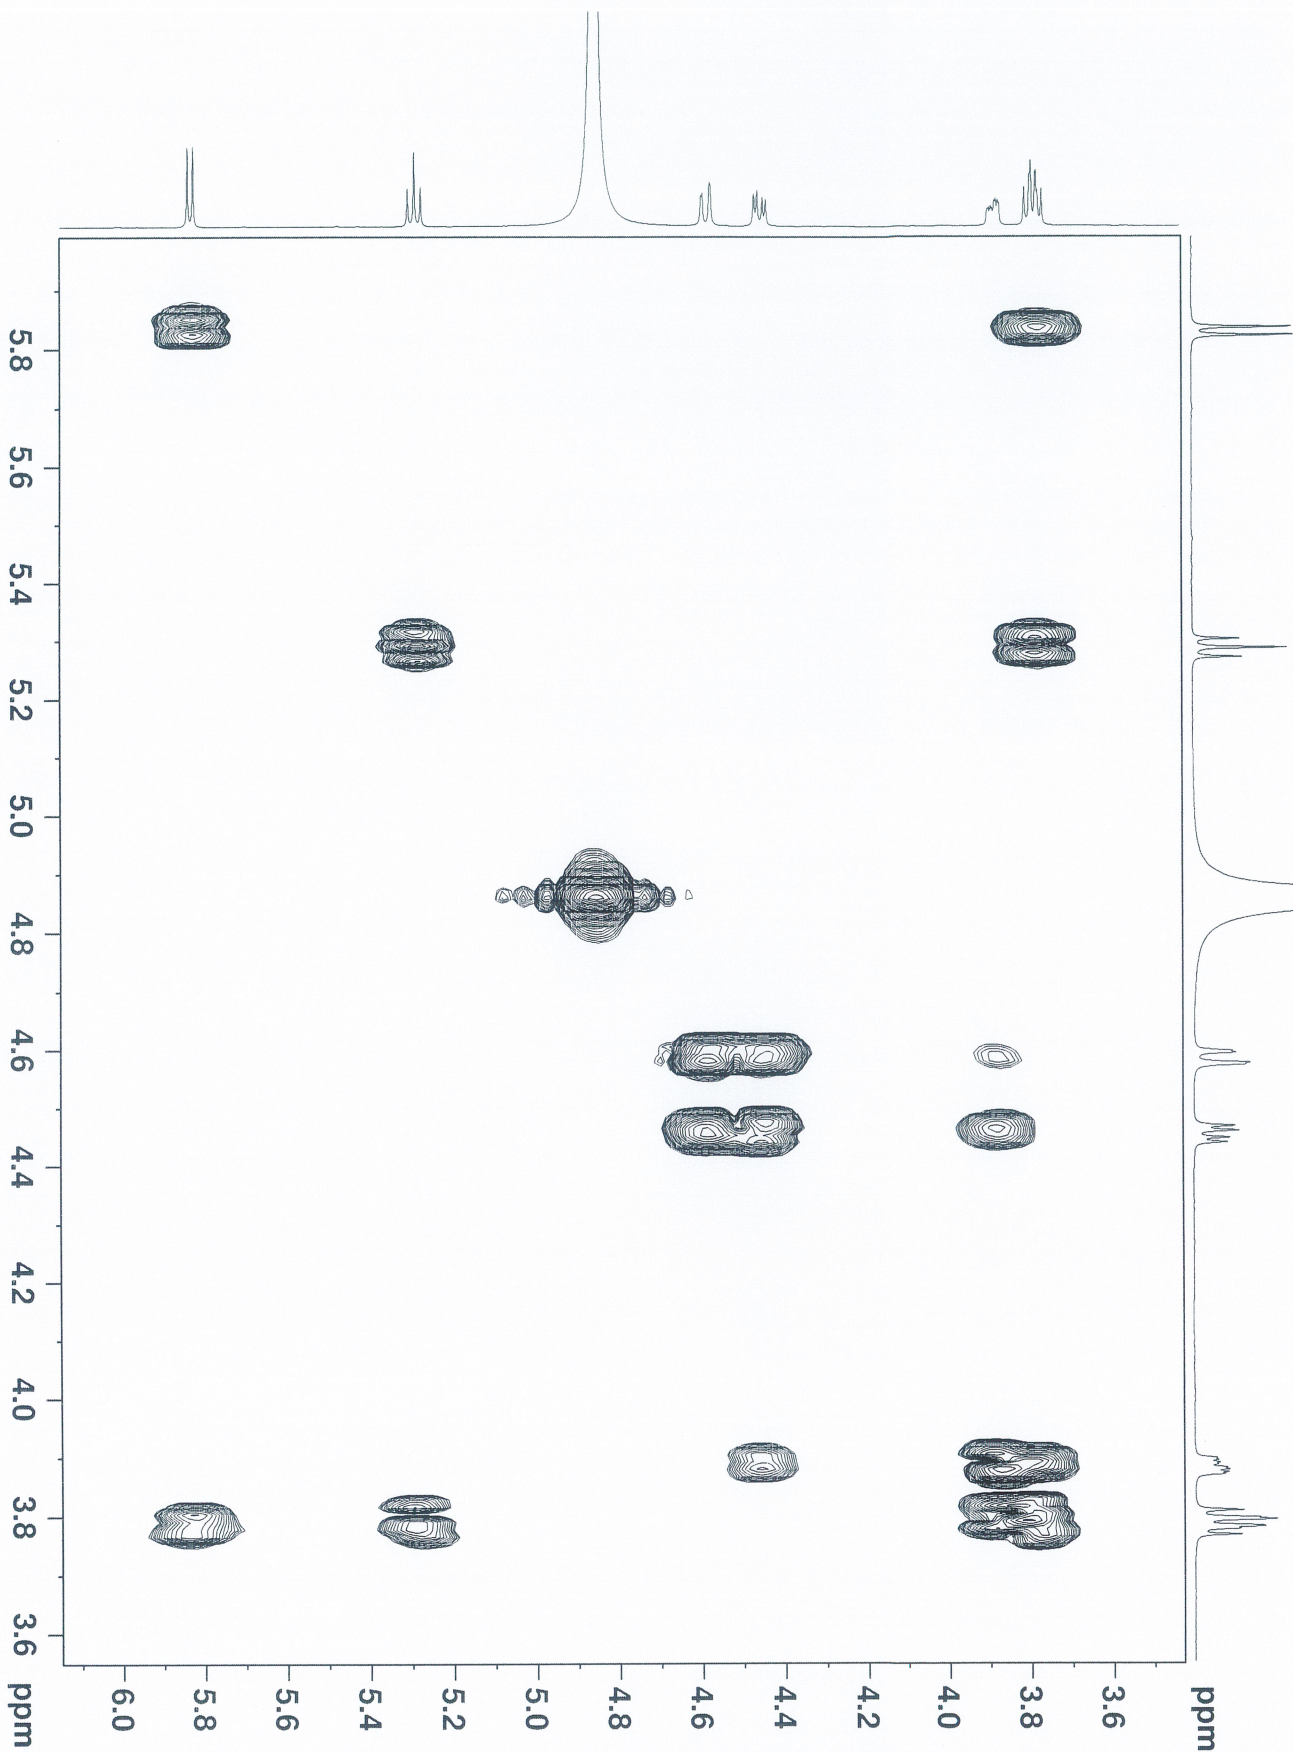

Current Data Parameters  
 NAME Component 3 of 3  
 CHEMNAME Chebulee Fructose\_230401  
 EXPNO 1  
 PROCNO 1  
 F2 - Acquisition Parameters  
 Date\_ 20231013  
 Time 01:03  
 INSTRUM Avance  
 PROBRD 2172446\_C005 (PULPROG  
 PULPROG zgpg30  
 TD 2048  
 SOLVENT H<sub>2</sub>O  
 NS 16  
 DS 16  
 SWH 7812.500 Hz  
 FIDRES 0.1310720 sec  
 AQ 64.000 usec  
 DE 298.1 K  
 TE 300.2 K  
 D0 0.0000000 sec  
 D11 0.0300000 sec  
 D12 0.0002000 sec  
 D13 0.0000400 sec  
 D16 0.0002000 sec  
 TDAY 0.00012501 sec  
 SFO1 600.130006 MHz  
 NUC1 1H  
 P0 11.92 usec  
 P1 11.92 usec  
 P2 11.92 usec  
 PLW1 17.17900085 W  
 PLW10 3.90540004 W  
 GRAM(1) SMO10.100  
 GZ1 10.00 %  
 F10 100.00 usec  
 F1 - Acquisition Parameters  
 TD 128  
 SFO1 600.130006 MHz  
 FIDRES 122.0000000 Hz  
 SW 13.018 ppm  
 FWHM 0.40 Hz  
 ENCODE OF  
 F2 - Processing Parameters  
 SI 1024  
 MC2 600.130010 MHz  
 WDW COSINE  
 SSB 0 Hz  
 LB 0 Hz  
 GB 0 Hz  
 PC 1.40



HP001

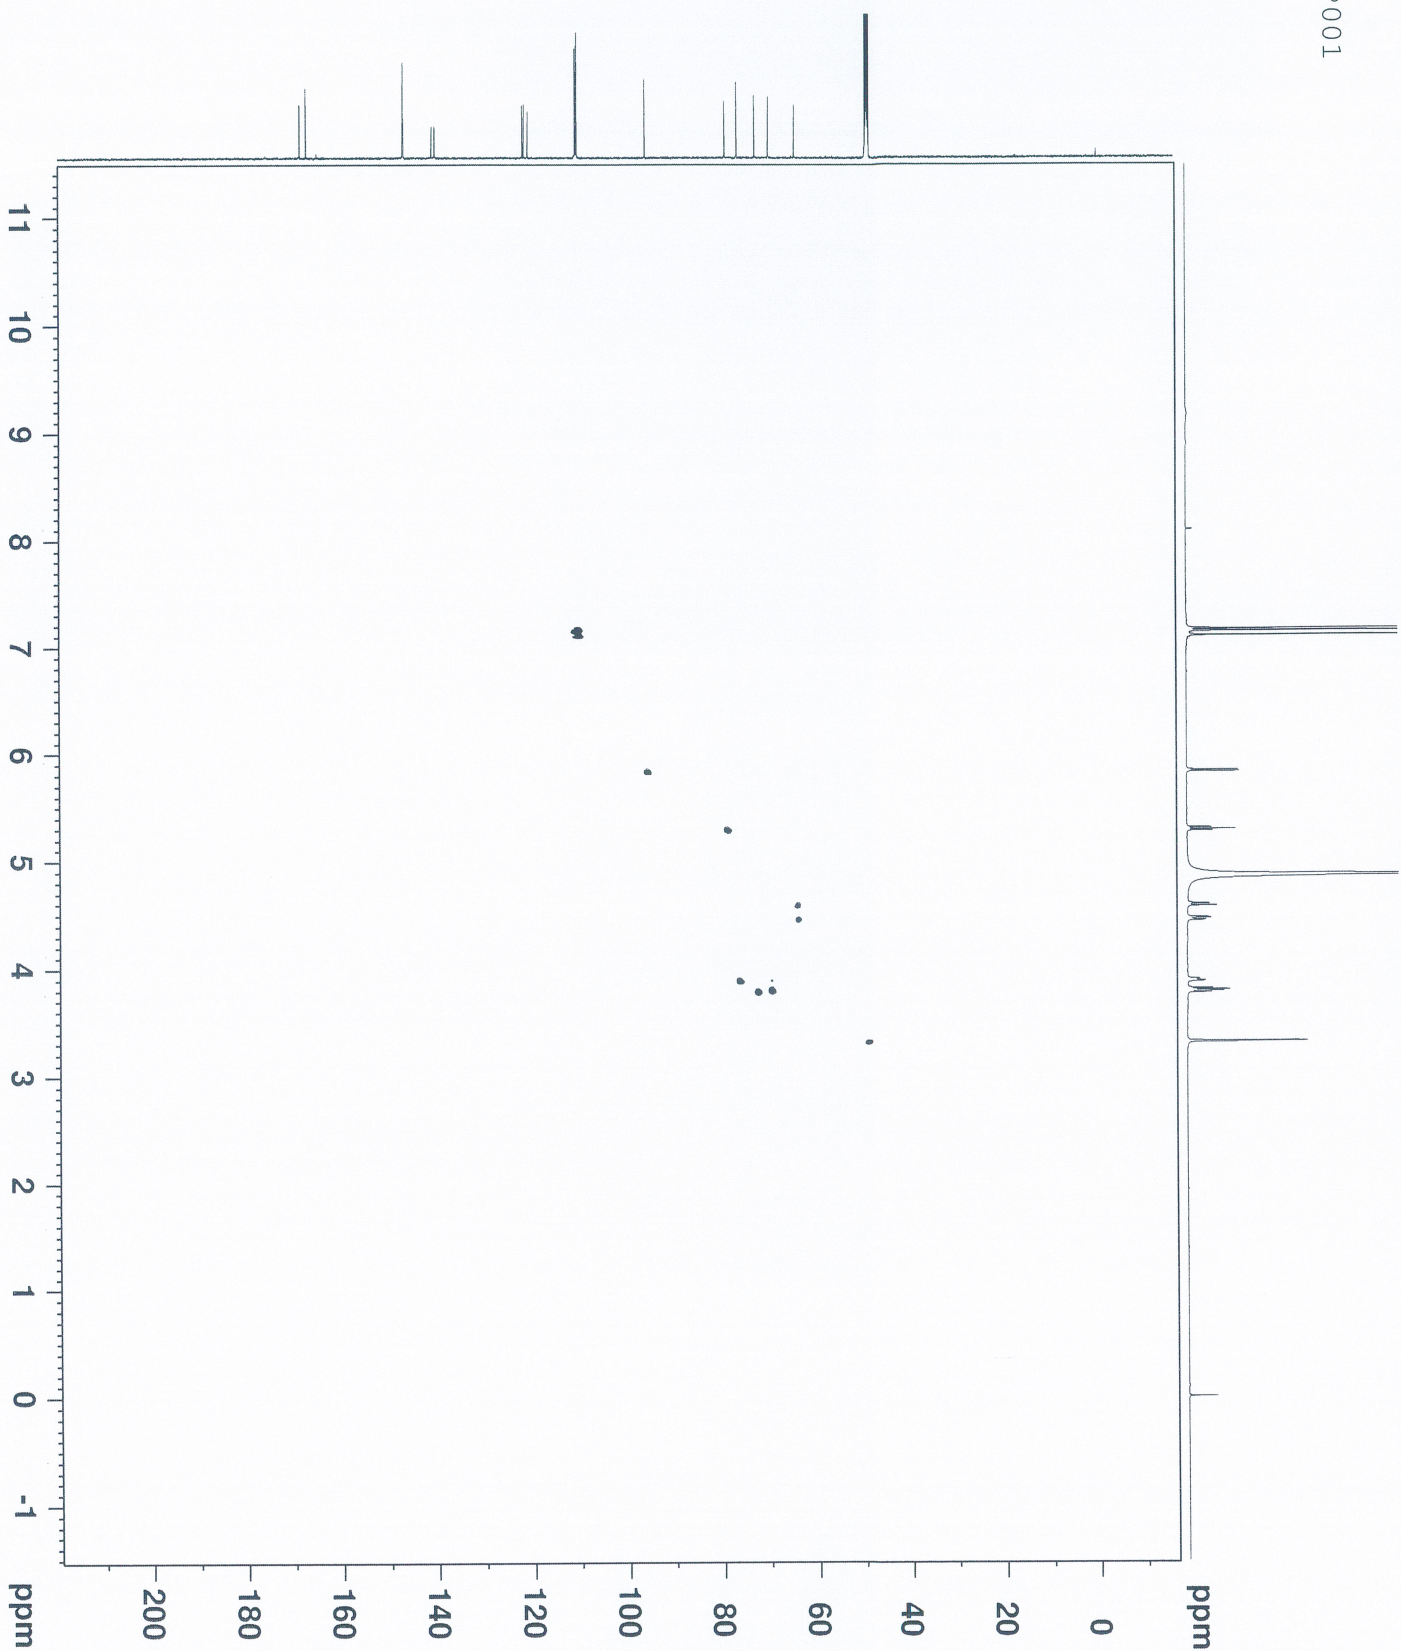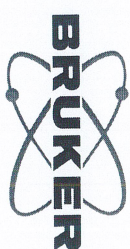

Current Data Parameters  
NAME Component 3 of 3  
PROBHD Chebulae Fructus 230401  
PROCNO 1  
F2 - Acquisition Parameters  
Date\_ 20121134  
Time\_ 20121134 h  
INSTRUM Avance  
PROBHD 2172446.0005 f  
PULPROG zgpg30  
TD 65536  
SOLVENT H<sub>2</sub>O  
NS 320  
DS 4  
SWH 7812.500 Hz  
FIDRES 7.623395 Hz  
AQ 0.13100 sec  
RG 1024  
WDW EM  
DE 64.000 usec  
TE 300.2 K  
CNS17 149.0000000  
CNS17 -0.5000000  
NUC1 1H  
P1 11.82 usec  
P2 19.36 usec  
P28 1600.00 usec  
PLW1 17.1790085 W  
SFO2 150.91938 MHz  
CROPC12 b1\_jpgpg30-4sp-2  
P3 11.80 usec  
P4 500.00 usec  
P5 200.00 usec  
P6 1730.00 usec  
P63 1500.00 usec  
LW 0 W  
P7 86.66300201 W  
P8 3.35190010 W  
P16 1000.00 usec  
P19 600.00 usec  
F1 - Acquisition parameters  
TD 1024  
SFO1 150.91938 MHz  
FIDRES 7.623395 Hz  
SW 236.015 ppm  
FNO1 2  
F2 - Processing parameters  
SI 1024  
SF 600.130014 MHz  
WDW EM  
SSB 0  
LB 0 Hz  
GB 0  
PC 1.40  
F1 - Processing parameters  
SI 1024  
SF 600.130014 MHz  
WDW EM  
SSB 0  
LB 0 Hz  
GB 0



HP001

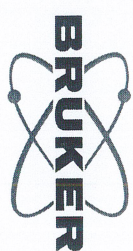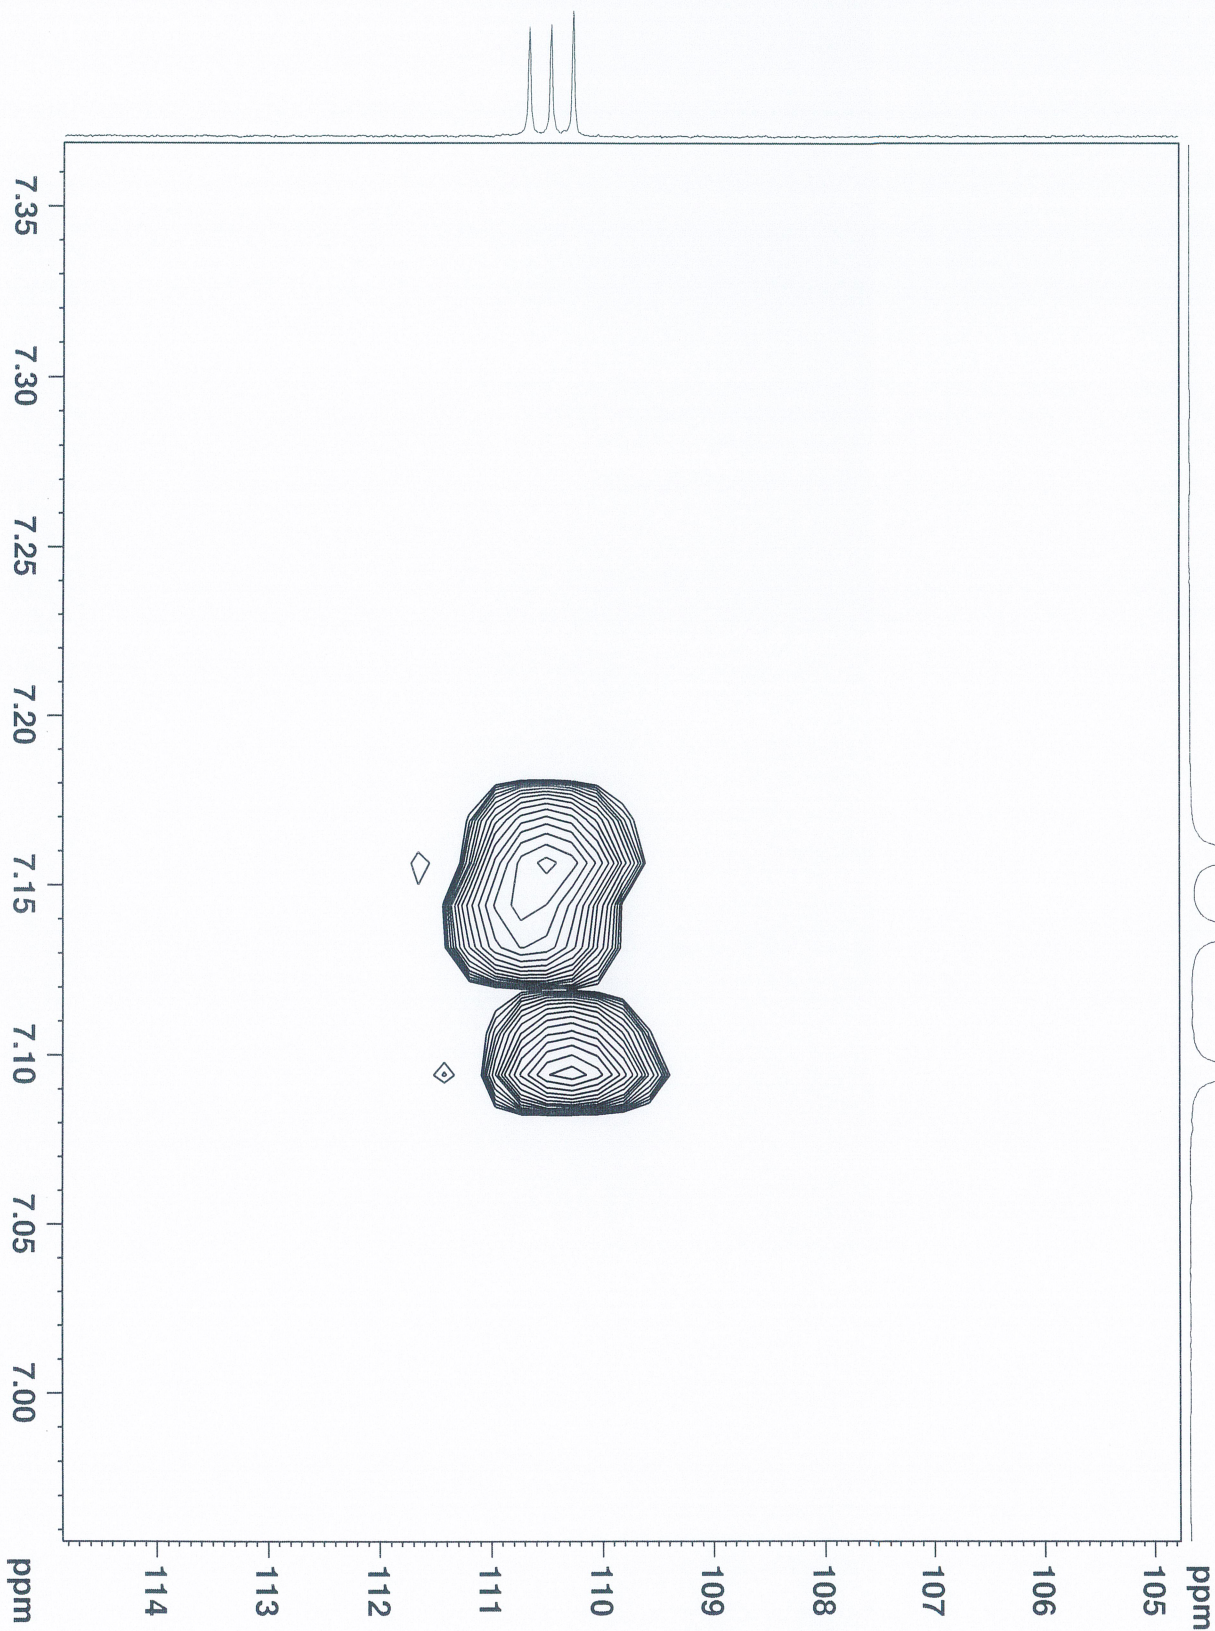

Current Data Parameters  
 NAME Component 3 of 5  
 EXPTNO 1  
 PROCNO 1  
 F2 - Acquisition Parameters  
 Date\_ 20231014  
 Time\_ 13:44  
 INSTRUM Avance  
 PROBRD 2172446.0005 f  
 P1 12.00  
 TD 65536  
 FIDRES 0.0925531  
 AQ 0.1310720  
 SOLVENT MeOD  
 NS 10  
 DS 4  
 SWH 7812.500 Hz  
 FIDRES 7.623395 Hz  
 AQ 0.1310720 sec  
 DE 64.000 usec  
 DE 6.50 usec  
 CHS12 149.0000000 K  
 CHS17 -0.5000000  
 D0 0.0000000 sec  
 D1 0.0000000 sec  
 D4 0.0017244 sec  
 D11 0.0300000 sec  
 D16 0.0050000 sec  
 D21 0.0050000 sec  
 D24 0.0009000 sec  
 INO 0.0001404 sec  
 SFO2 600.133006 MHz  
 NUC1 1H  
 P1 11.92 usec  
 P2 1.92 usec  
 P28 1000.00 usec  
 PLW1 17.1790085 W  
 SFO2 150.9178988 MHz  
 CDEPRG12 h1\_p5w4sp\_4sp\_2  
 P3 11.80 usec  
 P4 500.00 usec  
 P7 200.00 usec  
 P31 1730.00 usec  
 P63 1500.00 usec  
 PLW0 0 W  
 P1W12 3.35190010 W  
 P16 1000.00 usec  
 P19 600.00 usec  
 F1 - Acquisition parameters  
 TD 65536  
 SFO1 150.256 MHz  
 FIDRES 278.272491 Hz  
 SW 236.015 PPM  
 FREQ0E Echo-Attn Echo  
 F2 - Processing parameters  
 SI 1024  
 SF 600.1300116 MHz  
 SF 150.9025531 MHz  
 SSB 03112  
 LB 0 Hz  
 GB 0  
 PC 1.40  
 F1 - Processing parameters  
 SI 1024  
 SF 600.1300116 MHz  
 SF 150.9025531 MHz  
 WDW QSTINE  
 SSB 2  
 GB 0 Hz







HP001

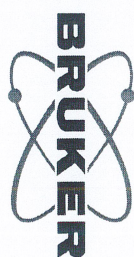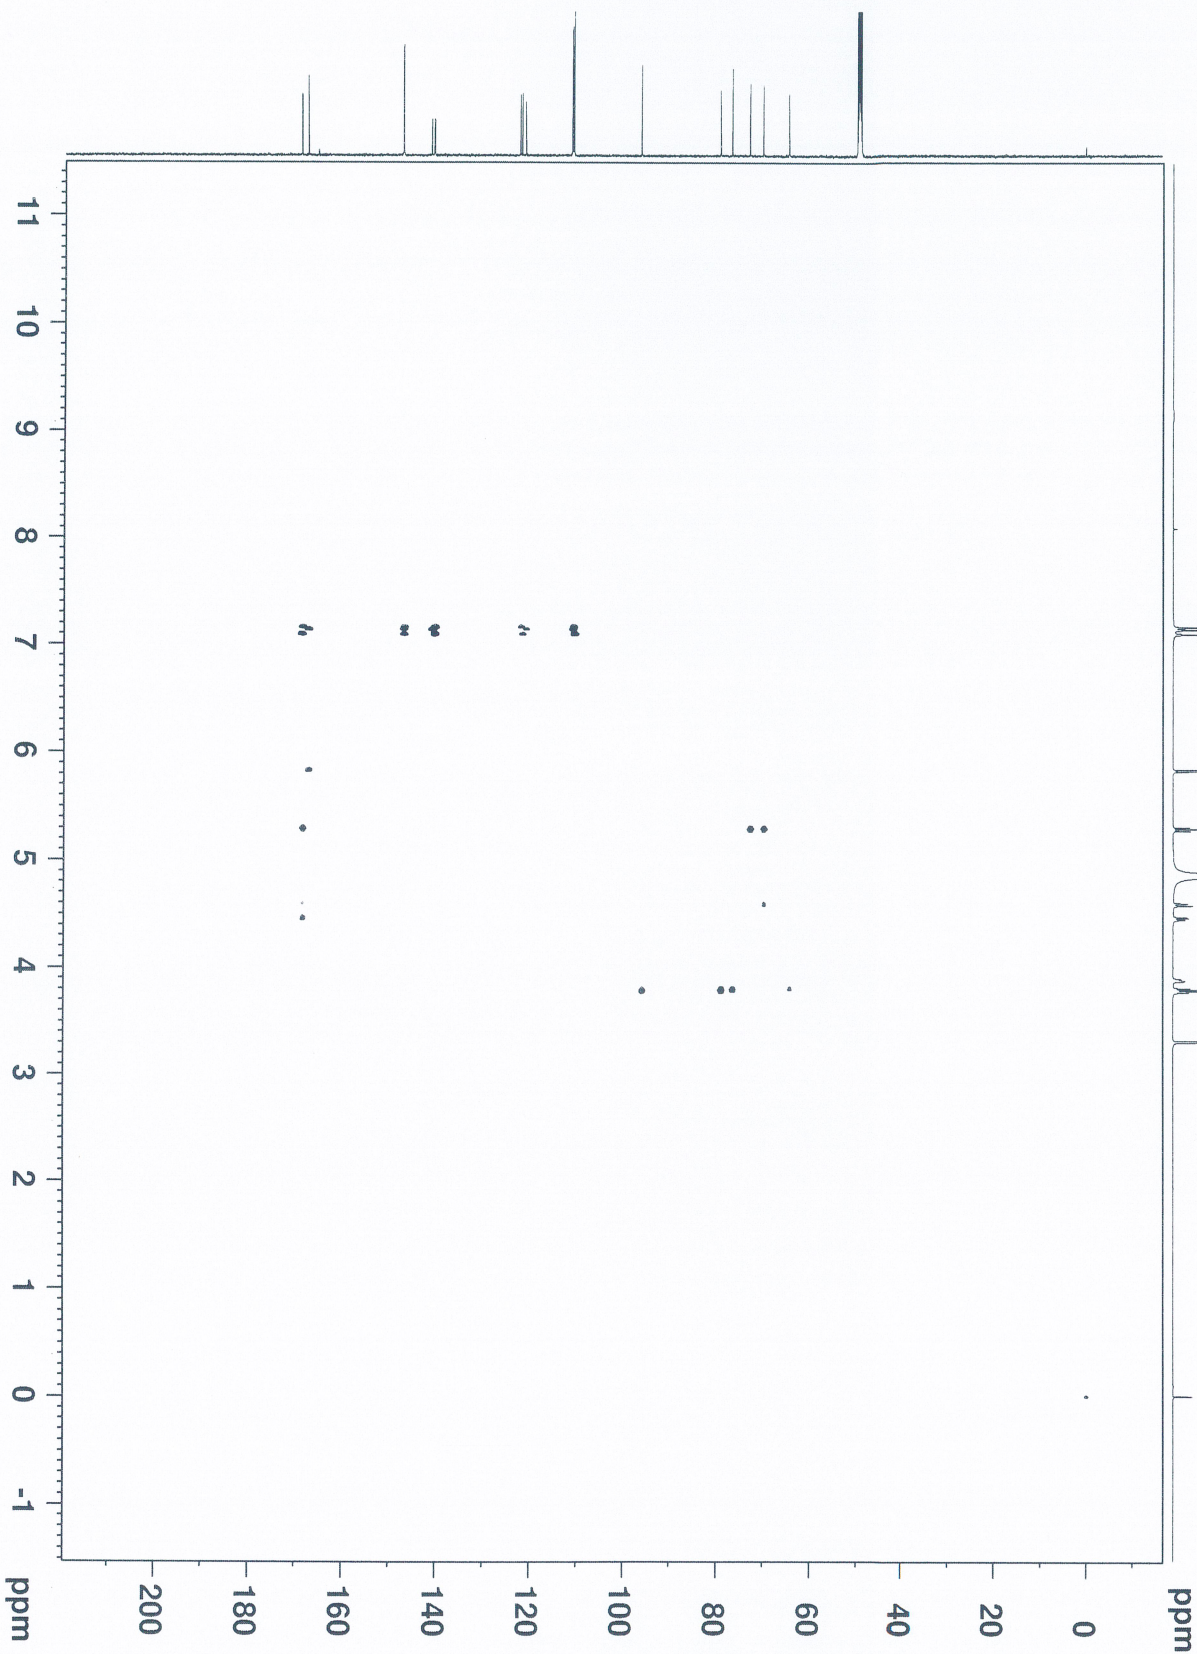

Current Data Parameters  
NAME: Compound 3  
EXPNO: 6  
PROCNO: 1  
F2 - Acquisition Parameters  
Date\_: 20230323  
Time: 20:35  
INSTRUM: Avance  
PROBHD: 2172446.0005 (1  
PULPROG: hmcetp13nd  
ID: 4096  
TD: 65536  
SOLVENT: MeOD  
DS: 4  
SSB: 16  
SWH: 7812.500 Hz  
FIDRES: 3.814697 Hz  
AQ: 0.2621440 sec  
RG: 101  
DM: 64.000 usec  
DE: 1024  
TE: 298.2 K  
CNS16: 120.0000000  
CNS17: 170.0000000  
CNS18: 8.0000000  
D1: 0.00000300 sec  
D2: 0.00000300 sec  
D3: 0.00000300 sec  
D16: 0.0020000 sec  
IN0: 0.00001403 sec  
TDav: 1  
SF01: 600.1330006 MHz  
NUC1: 1H  
P1: 11.92 usec  
PL1: 0.00 dB  
PL12: 17.17900085 W  
SF02: 150.9178988 MHz  
NUC2: 13C  
P3: 11.80 usec  
PL12: 2000.00 usec  
PL12: 86.66302001 W  
F16: 150.9178988 MHz  
CNS130: 0.1598119  
F1 - Acquisition Parameters  
TD: 256  
SF01: 150.9179 MHz  
FIDRES: 278.272491 Hz  
SW: 236.015 FPM  
FMODE: Echo-Antiecho  
F2 - Processing Parameters  
SI: 2048  
SF: 600.1300127 MHz  
WDW: SINE  
SSB: 4  
LB: 0 Hz  
GB: 0  
PC: 1.40  
F1 - Processing Parameters  
SI: 1024  
MC2: echo-antiecho  
SF: 150.9025931 MHz  
WDW: EM  
SSB: 0  
LB: 0 Hz  
GB: 0



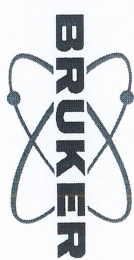

Current Data Parameters  
NAME Component 3 of 3  
CHEBULAE Fructus\_230401

EXPERNO 6  
PROCNO 1

F2 - Acquisition Parameters  
Date\_ 20231013  
Time 20.35 h

INSTRUM Avance  
PROBHD 2172446.0005 (

PD1PRG2 hmbcetgpc130d

TD 4  
SOLVENT MeOD

NS 54

DS 16

SWH 7812.500 Hz

FIDRES 3.814697 Hz

AQ 0.262140 sec

RG 400

DE 64.000 usec

TE 298.2 K

CNST6 120.0000000

CNST7 170.0000000

CNST8 100.0000000

CNST13 0.0000300 sec

D1 2.00000000 sec

D6 0.06250000 sec

DL6 0.00020000 sec

INO 0.00001404 sec

TDav 1

SFO1 600.1330000 MHz

NUC1 13C

P1 11.92 usec

P2 23.84 usec

PLM1 17.17900085 W

SFO2 150.9178988 MHz

NUC2 13C

P3 1.86 usec

PLM2 200.0000000 W

PLM2 86.66300201 W

PL6 1000.00 usec

CNST30 0.598115

F1 - Acquisition Parameters

TD 150.4756 MHz

PROBHD 2172446.0005 (

SW 236.015 ppm

FNOCDE Echo-Antlecho

F2 - Processing Parameters

SI 2048

SE 600.1300120 MHz

SSB 4

LB 0 Hz

GB 0

PC 1.40

F1 - Processing Parameters

SI 1024

SE 150.9025931 MHz

SSB 2

LB 0 Hz

GB 0

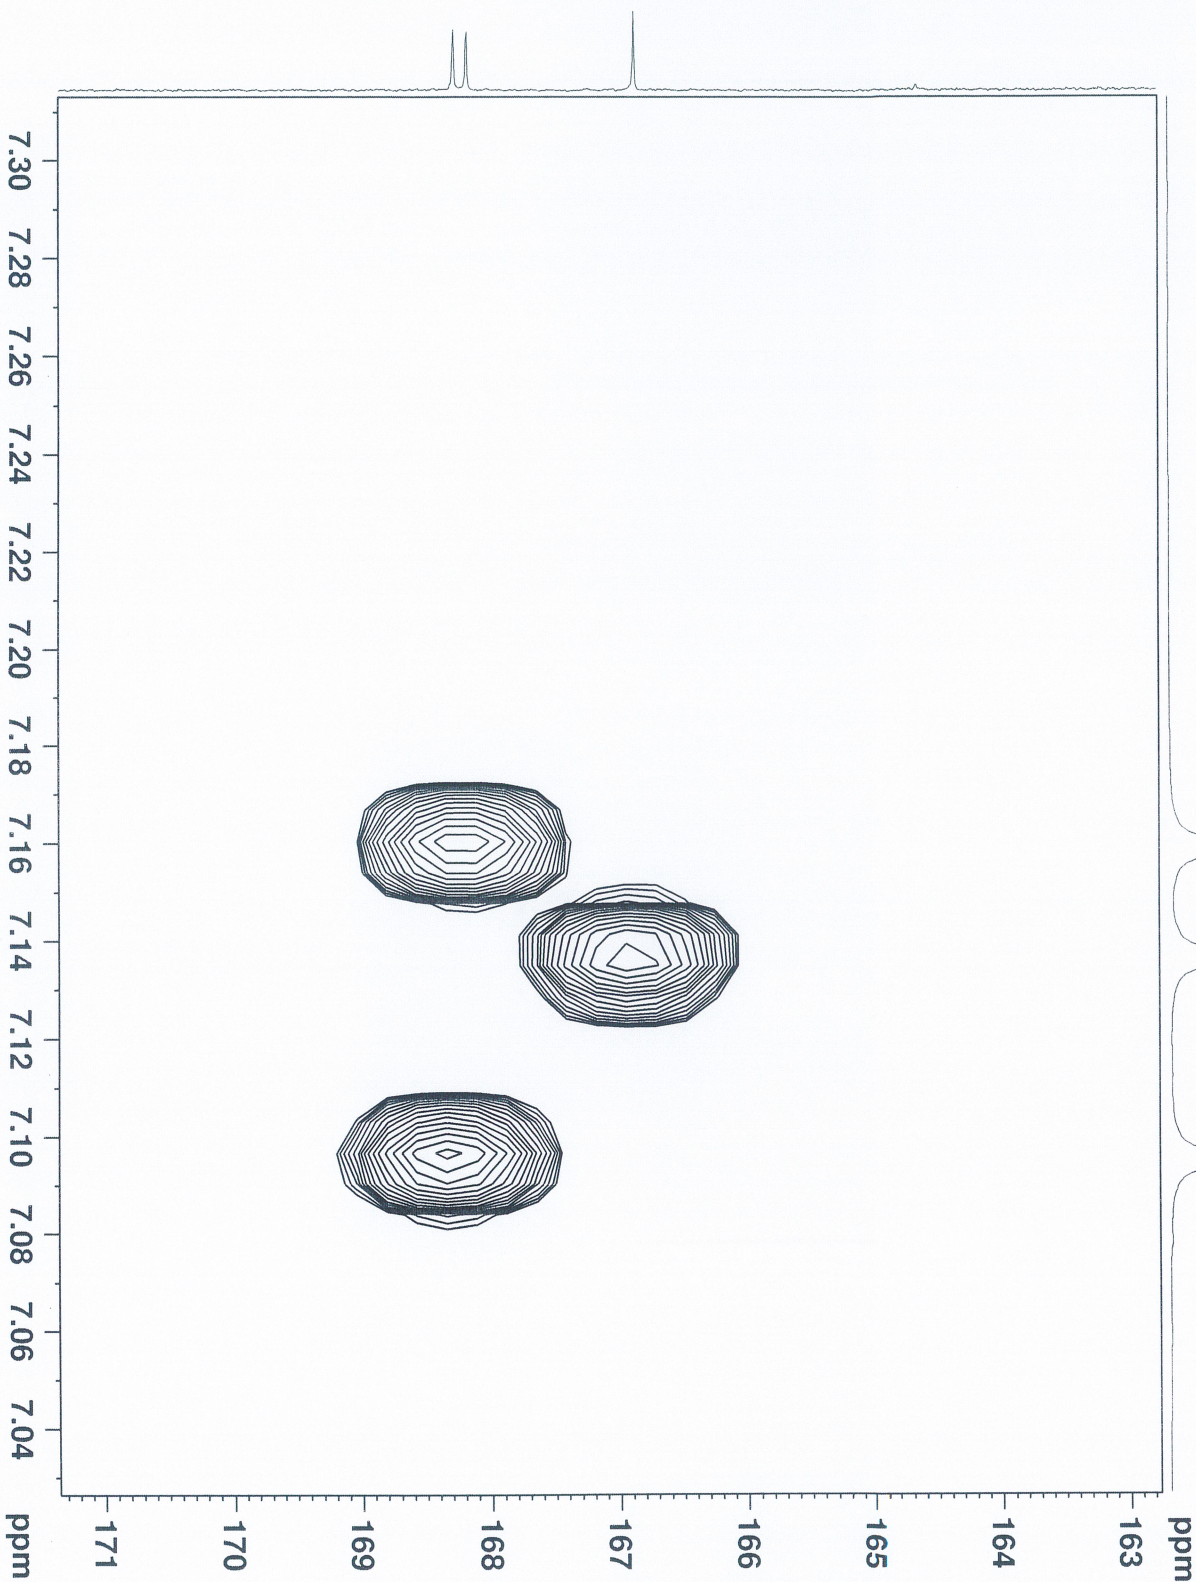



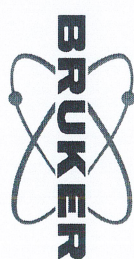

## Current Data Parameters

NAME Component 3 of  
CHEBULEE FRUCTUS\_230401

EXPNO 6  
PROCNO 1

## F2 - Acquisition Parameters

Date\_ 20230310  
Time 20:35 h

INSTRUM Avance  
PROBHD 2172446\_0005 (

PULPROG hmbcetcp13nd  
TD 4096

TD 4096  
SOLVENT MeOD

DS 16  
SWH 7812.500 Hz

FIDRES 3.814697 Hz  
AQ 0.2621440 sec

RG 101  
DM 64.000 usec

DE 64.000 usec  
TE 296.2 K

CNST6 120.0000000  
CNST7 170.0000000

CNST13 8.0000000  
D0 0.0000300 sec

D1 0.0000300 sec  
D2 0.0000300 sec

D16 0.0002000 sec  
IN0 0.0003404 sec

TDav 1  
SFO1 600.1330006 MHz

NUC1 1H  
P1 11.92 usec

P2 11.92 usec  
PL1 17.1790085 W usec

SFO2 150.9178988 MHz  
NUC2 13C

P3 11.80 usec  
P4 2000.00 usec

PW2 86.6500201 W  
P3 11.80 usec

CNST30 0.59815  
F1 - Acquisition Parameters

TD 256  
SFO1 150.9179 MHz

FIDRES 278.272491 Hz  
SM 226.015 ppm

FMODE Echo-Antiecho  
F2 - Processing Parameters

SI 2048  
SF 600.1300127 MHz

WDW SSB  
GB 4

PC 1.40  
F1 - Processing Parameters

SI 1024  
MC2 echo-antiecho

SF 150.9028931 MHz  
WDW COSY

SSB 2  
LB 0 Hz

GB 0  
F2 - Processing Parameters

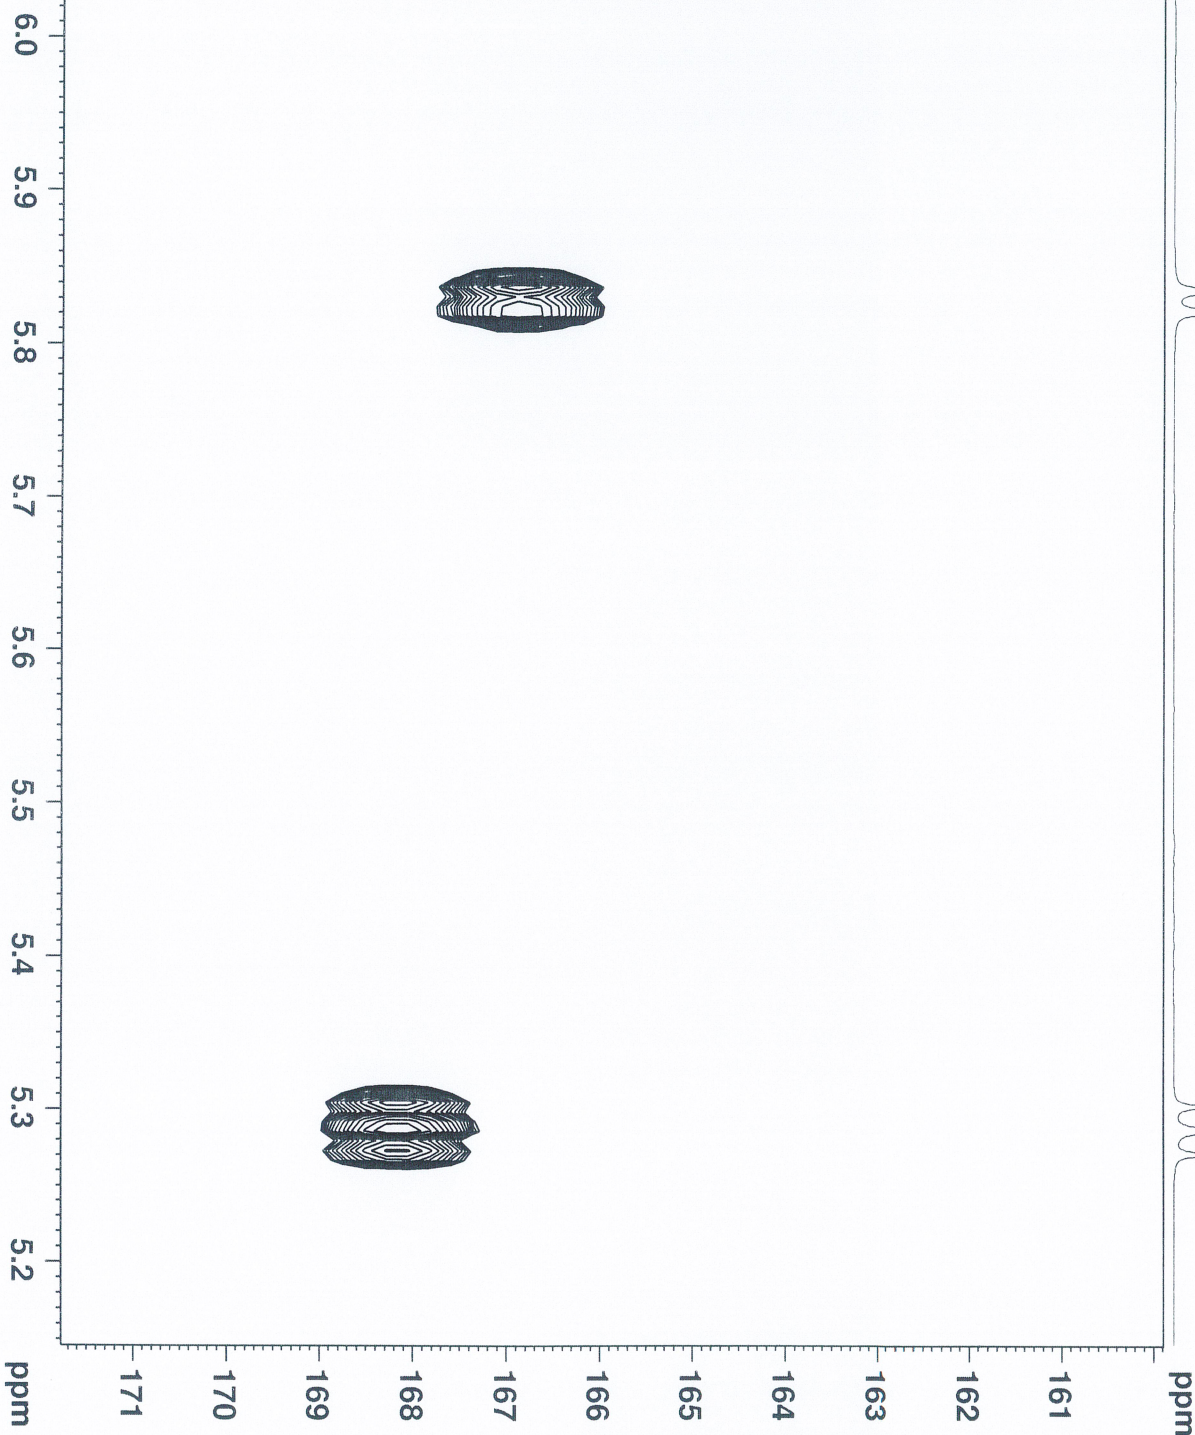



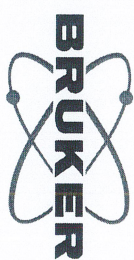

Current Data Parameters  
NAME Component 3 of 3  
CHEBULAE Fructus\_230401

EXPNO 6  
PROCNO 1

F2 - Acquisition Parameters

INSTRUM 2172446.D005 (

PULPROG hmcetcp1.3nd

TD 4096

SOLVENT ReoD

DS 16

SWH 7812.500 Hz

FIDRES 3.814697 Hz

AQ 0.2621440 sec

RG 101

RG 64.000 usec

RG 28.500 usec

RG 28.500 K

CNST6 120.0000000

CNST7 170.0000000

CNST13 8.0000000

D0 0.00000360 sec

D1 0.00000000 sec

D2 0.00000000 sec

D3 0.00000000 sec

D4 0.00000000 sec

INO 0.0001404 sec

TDav 1

SFO1 600.130006 MHz

NUC1 1H

F2 11.82 usec

F2 13.82 usec

PLW1 17.1790085 MHz

SFO2 150.978988 MHz

NUC2 13C

F3 11.80 usec

F2W2 2000.00 usec

F2W2 86.6600201 W

NUC3 13C

CNST30 0.09815

F1 - Acquisition Parameters

TD 256

SFO1 150.9179 MHz

FIDRES 278.272491 Hz

SM 236.015 ppm

FMODE Echo-Antiecho

F2 - Processing Parameters

SI 2048

SF 600.1300127 MHz

WDW SINE

SSB 4

GB 0 Hz

PC 1.40

F1 - Processing Parameters

SI 1024

MC2 echo-antiecho

SF 150.9025931 MHz

WDW QSINE

SSB 2

LB 0 Hz

GB 0

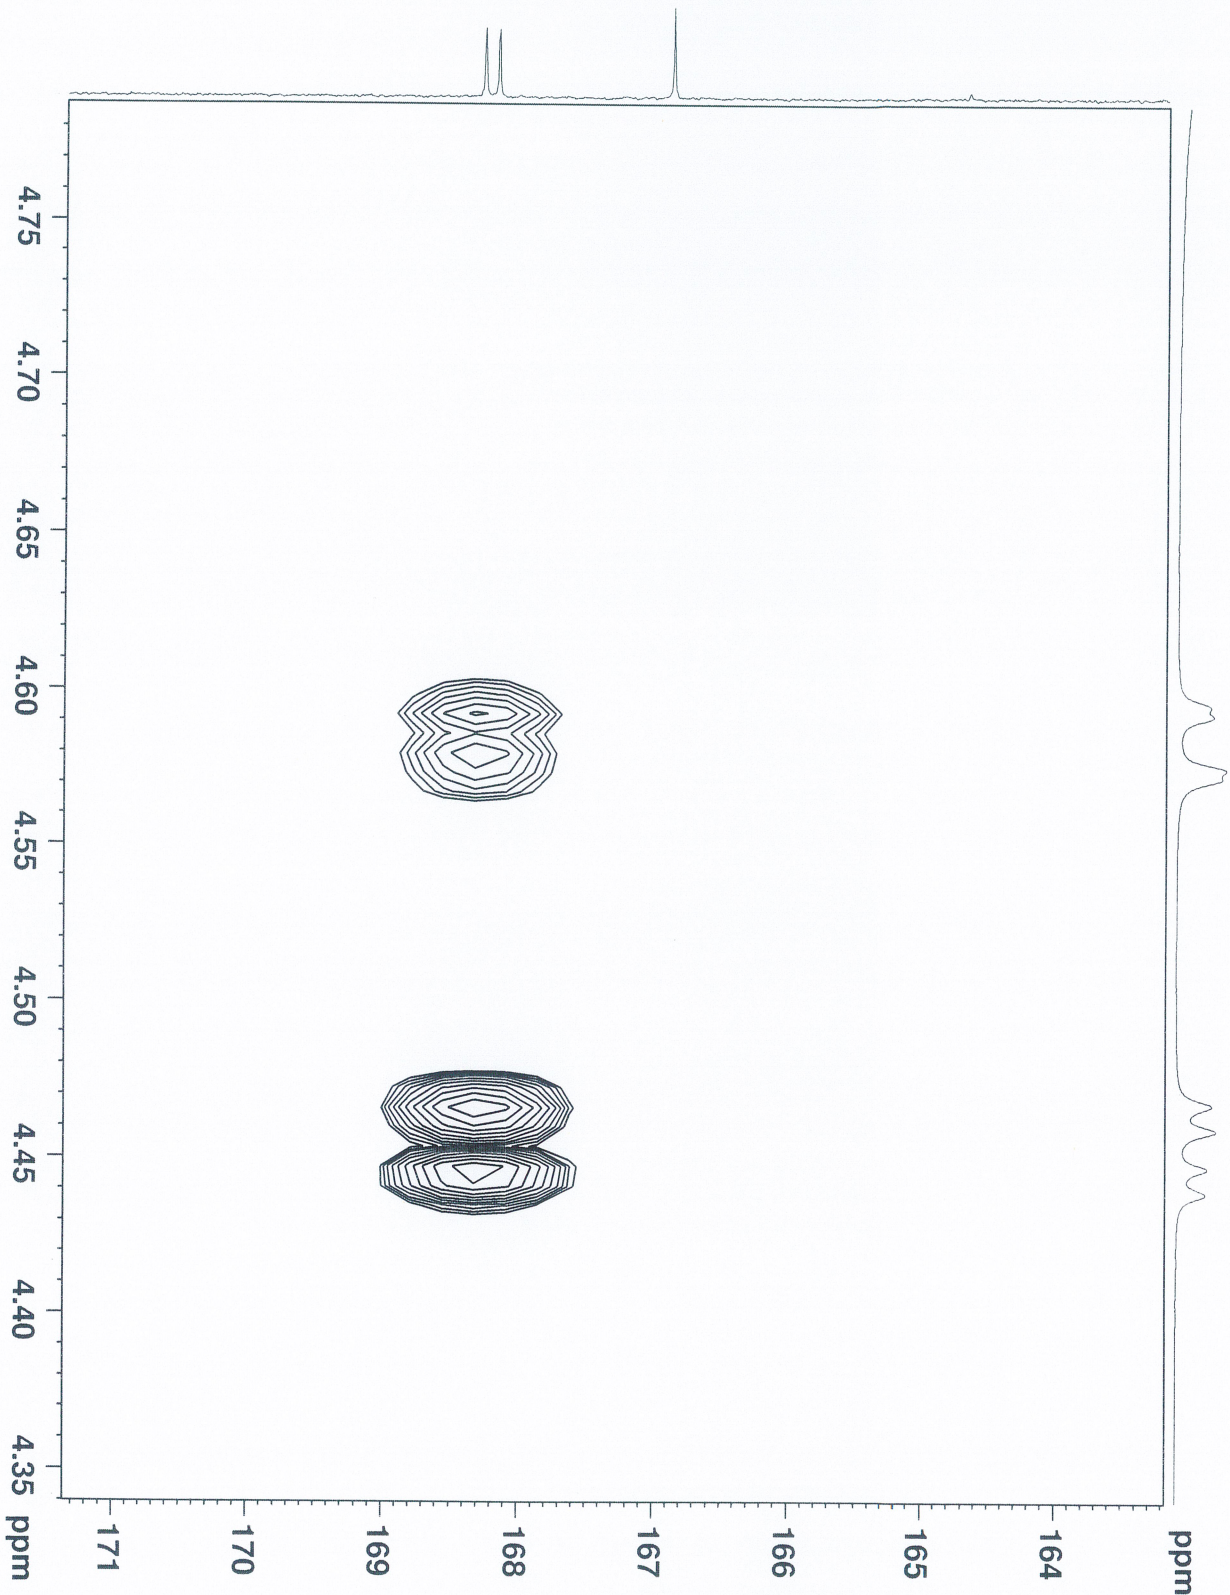



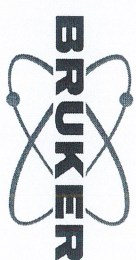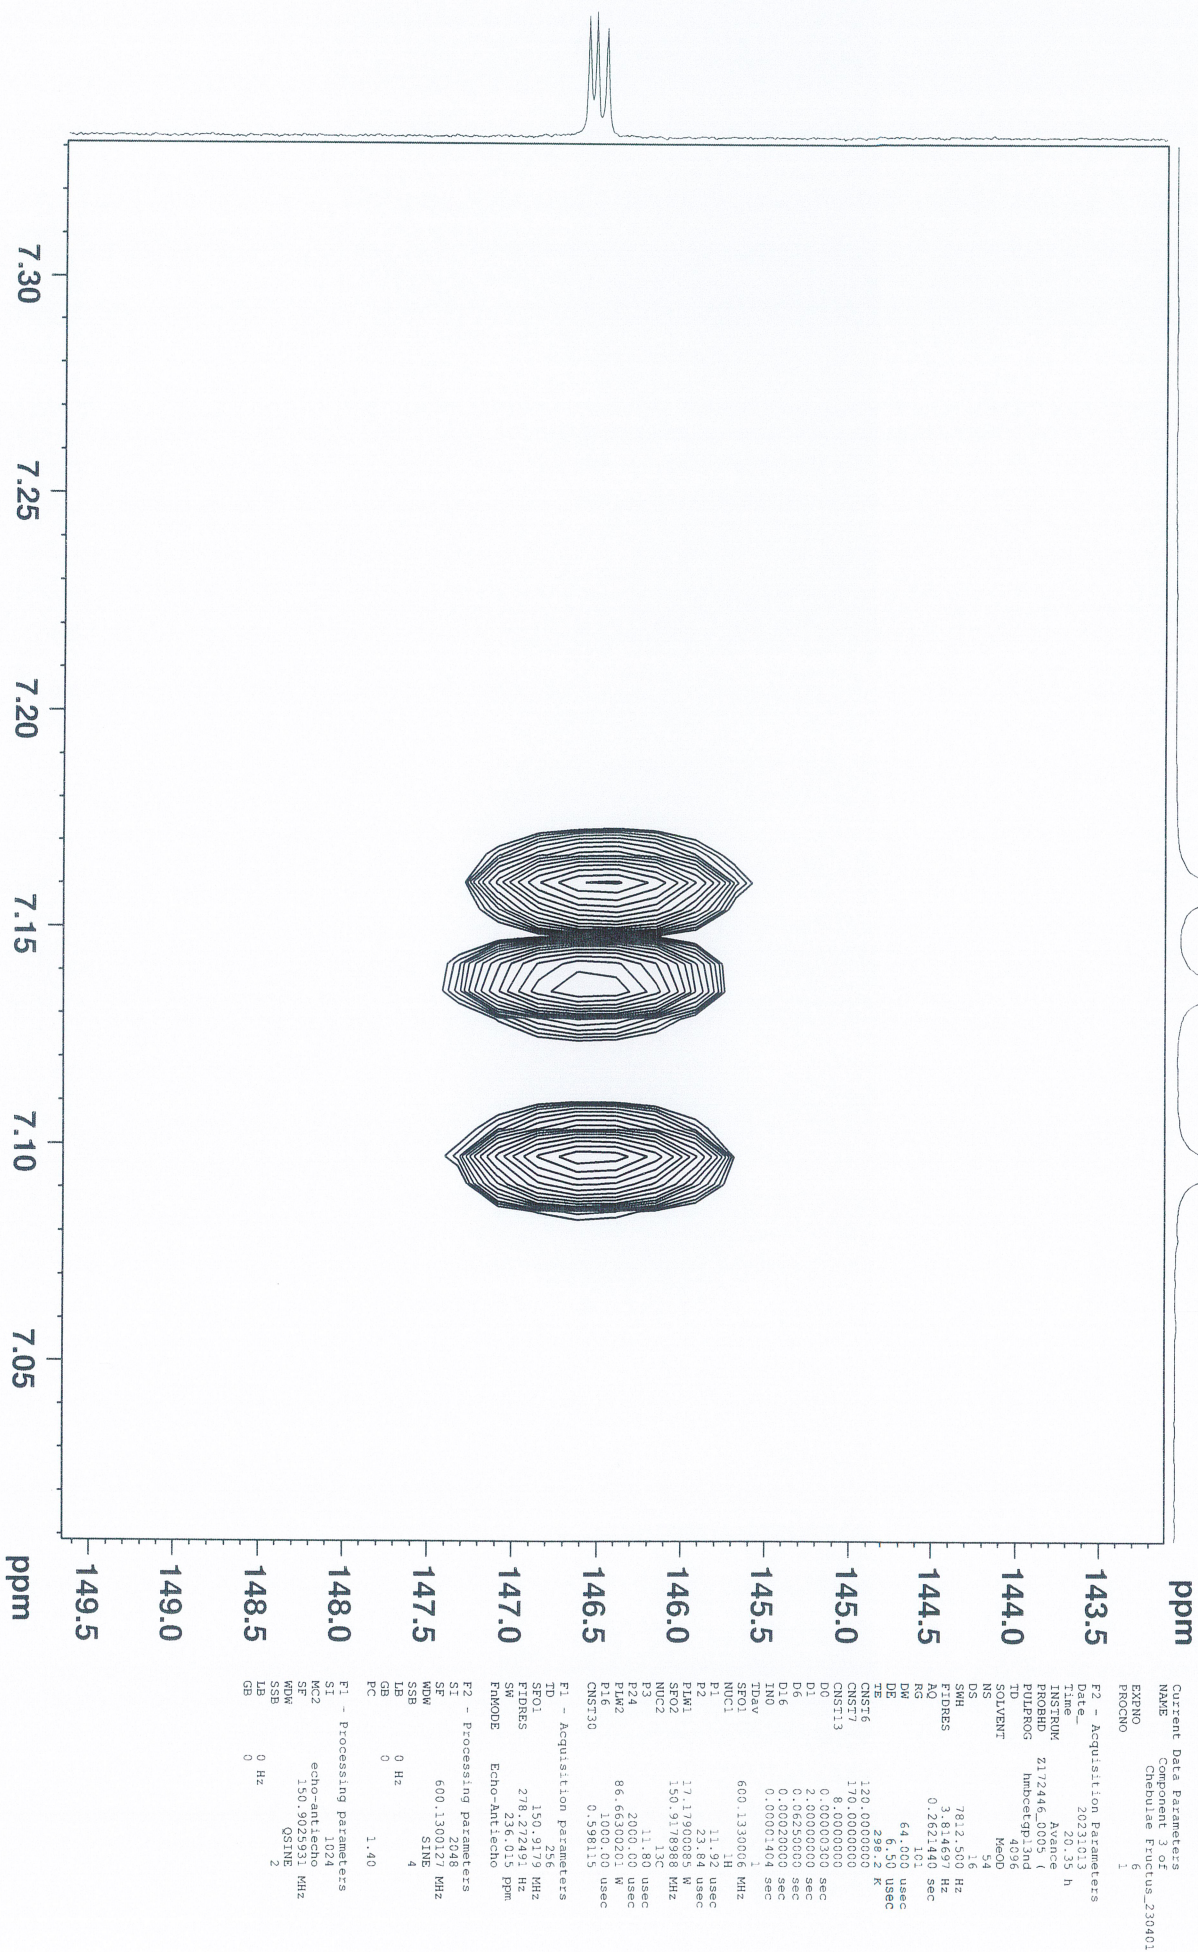



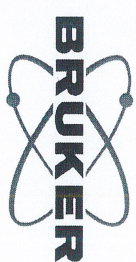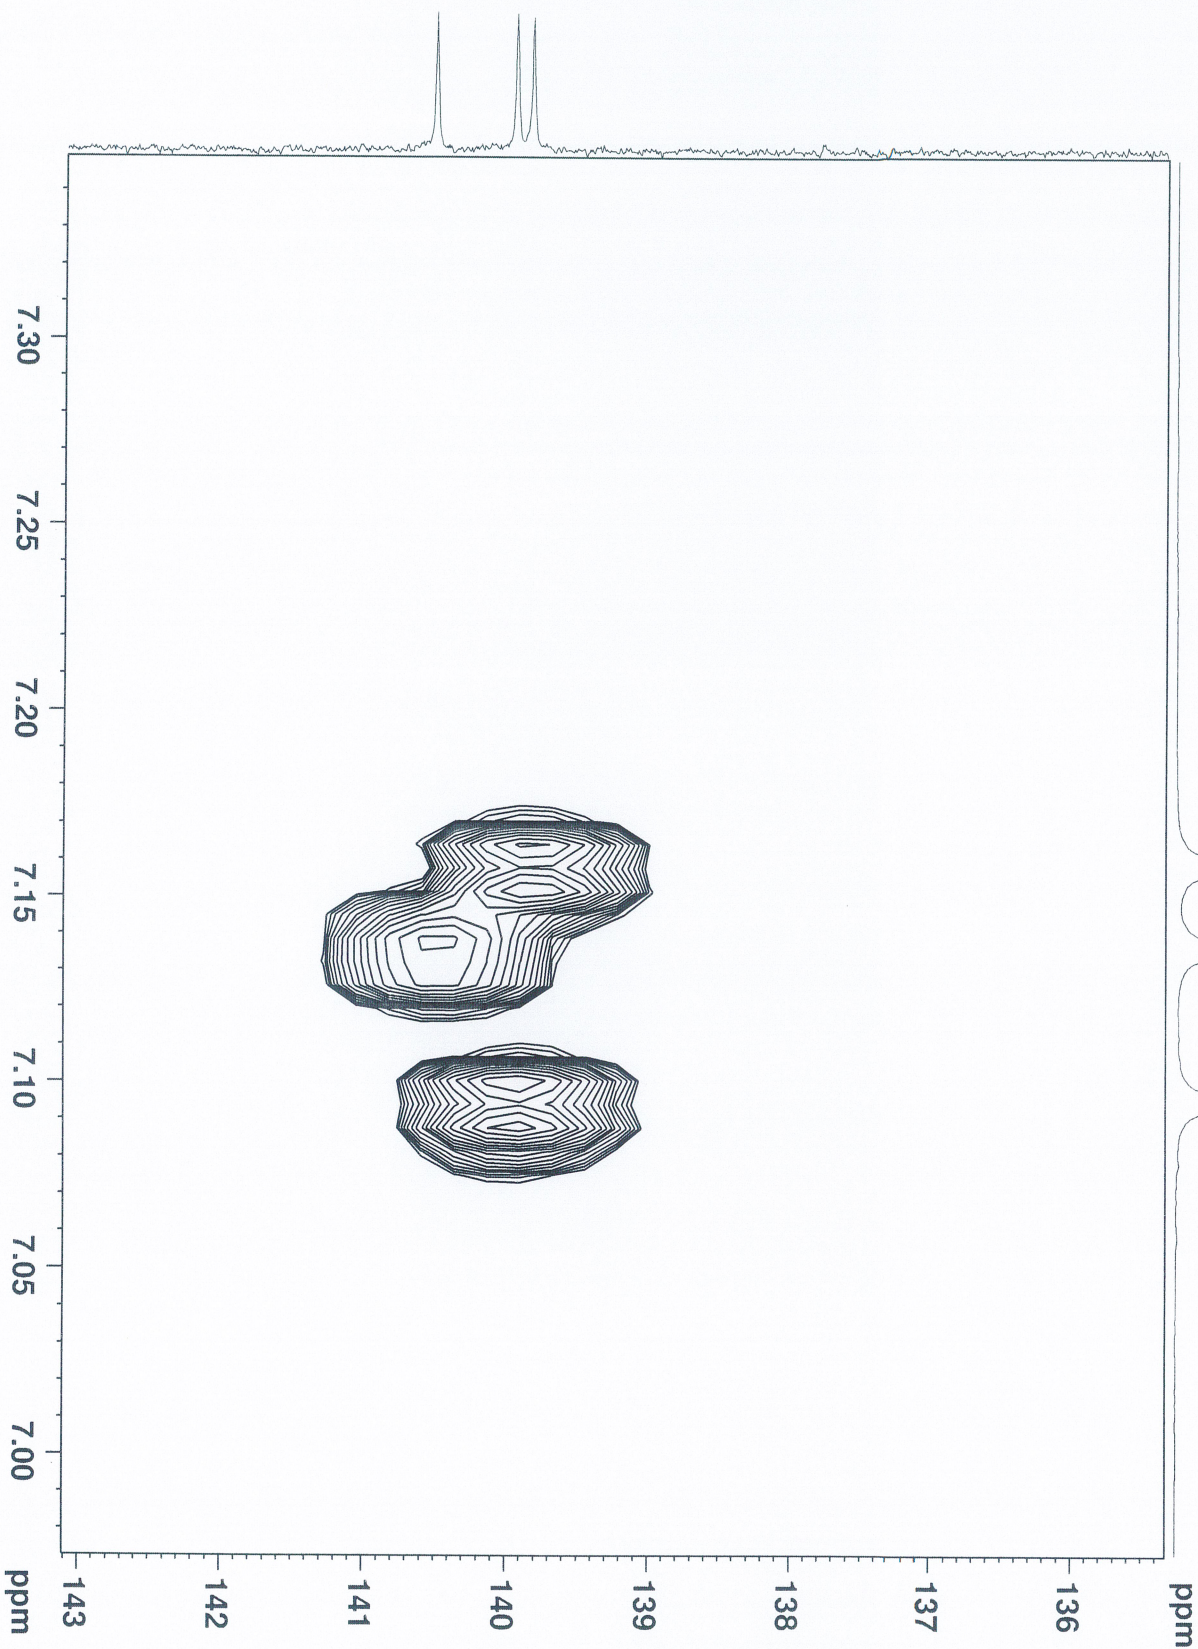

Current Data Parameters  
NAME Component 3 of 3  
Chemical Shifts: 230401

EXPNO 6  
PROCNO 1

F2 - Acquisition Parameters

Date\_ 20230103

Time 20.35 h

INSTRUM Avance

PROBHD 217246-2005 (

PULPROG hmbcpg1.1nd

ID 4096

TD 65536

DO 1

DS 16

SWH 781.2500 Hz

FIDRES 3.814697 Hz

AQ 0.2621440 sec

RG 101

DM 64.000 usec

DE 170.0000000

TE 298.2 K

CNST6 120.0000000

CNST7 170.0000000

CNST13 8.0000000

D0 0.0000360 sec

D1 0.0000000 sec

D2 0.0625000 sec

D3 0.0002000 sec

D4 0.0001404 sec

TDav 1

SFO1 600.130006 MHz

NUC1 1H

F2 11.82 usec

F2 23.88 usec

PLW1 17.1790085 W

SFO2 150.9176988 MHz

NUC2 13C

F3 11.80 usec

F24 2000.00 usec

PLW2 86.6500201 W

F4 11.80 usec

CNST30 0.598115

F1 - Acquisition Parameters

TD 256

SFO1 150.9179 MHz

FIDRES 278.272491 Hz

SF 226.015 ppm

FMODE Echo-Antiecho

F2 - Processing Parameters

SF 2048

WDW SINE

SSB 4

GB 0 Hz

PC 1.40

F1 - Processing Parameters

SF 1024

MC2 echo-antiecho

SF 150.9025931 MHz

WDW GQ1M2

SSB 2

LB 0 Hz

GB 0



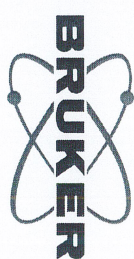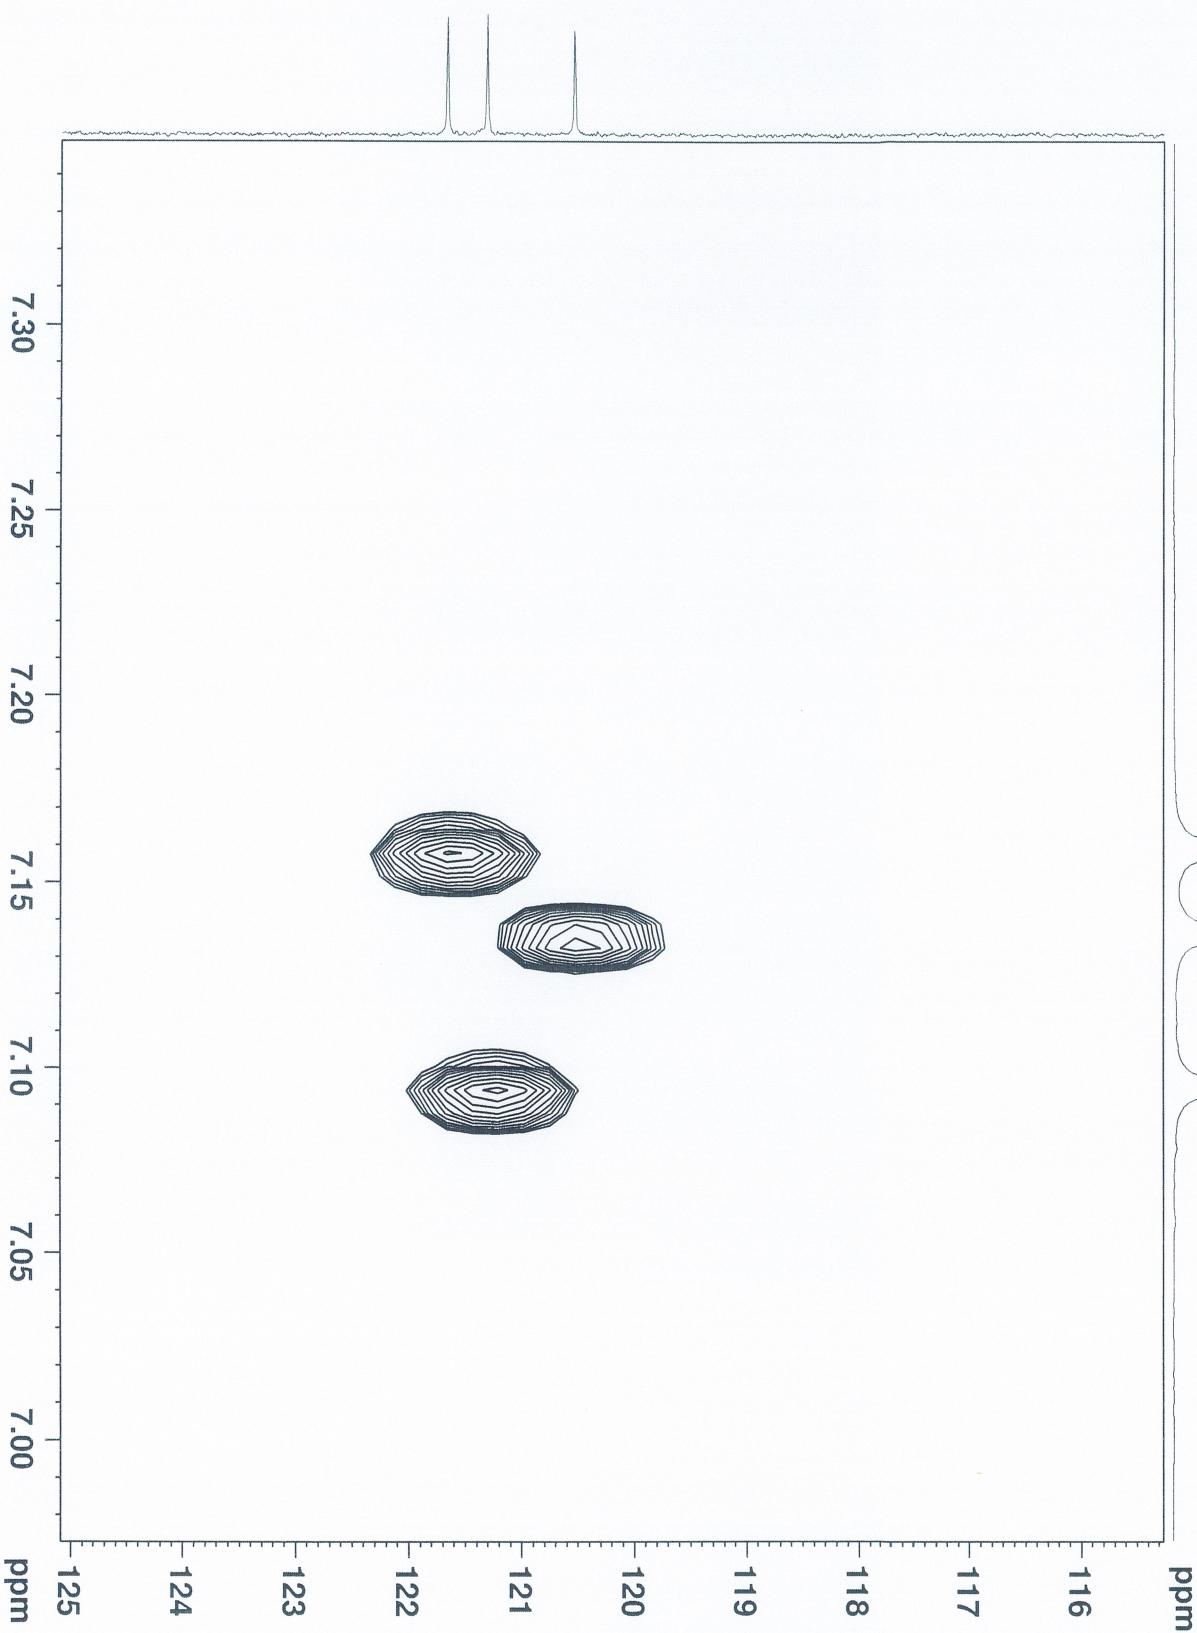

Current Data Parameters  
NAME Component 3 of 6  
CHEBUZEE FRUCTUS\_230401

EXPNO 6  
PROCNO 1

F2 - Acquisition Parameters  
Date\_ 20230313  
Time 20.35 h  
INSTRUM Avance  
PROBHD 2172446\_0005 (1  
PULPROG hmbc4cp13nd  
TD 4096  
SOLVENT MeOD  
NS 16  
DS 16  
SWH 7832.500 Hz  
FIDRES 3.814697 Hz  
AQ 0.2621440 sec  
RG 101  
DM 64.00 usec  
DE 15.50 usec  
TE 296.2 K  
TDav 1  
SFO1 600.130006 MHz  
NUC1 1H  
P1 11.80 usec  
PL1 23.84 usec  
SFO2 150.91790085 MHz  
NUC2 13C  
P2 11.80 usec  
PL2 2000.00 usec  
P3 86.6500201 W  
F3 1.2000000 usec  
CHST30 0.99815

F1 - Acquisition Parameters  
TD 256  
SFO1 150.9179 MHz  
FIDRES 278.272491 Hz  
SFO2 236.015 ppm  
EPCODE Echo-Antiecho

F2 - Processing Parameters  
SI 2048  
SF 600.1300127 MHz  
WDW SINE  
SSB 4  
GB 0 Hz  
PC 1.40

F1 - Processing Parameters  
SI 1024  
MC2 echo-antiecho  
SF 150.9028931 MHz  
WDW Q9SINE  
SSB 2  
GB 0 Hz



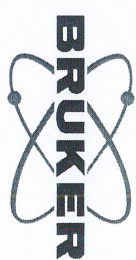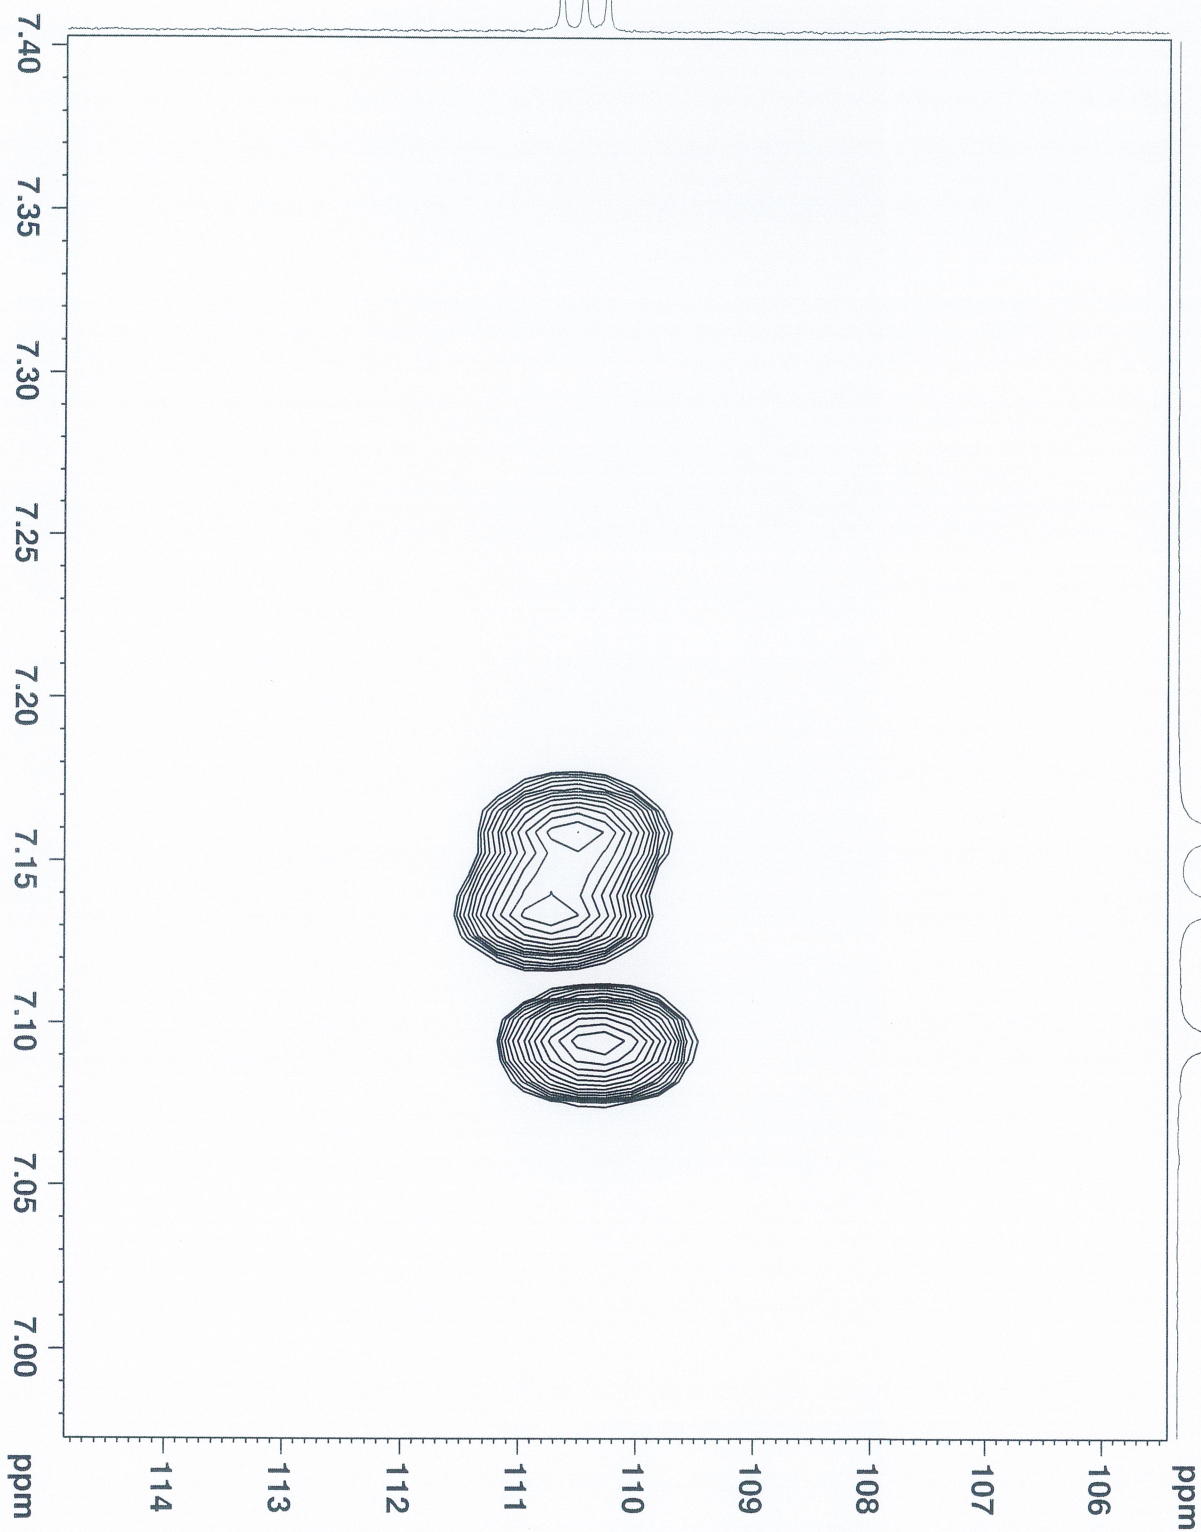

Current Data Parameters  
NAME C:\Program Files\Bruker\WinNMR\Projects\HP001\Chemical\Fructus\_230401

EXPNO 6

PROCNO 1

F2 - Acquisition Parameters

Time 20:20:00

h

INSTRUM Avance

PROBHD 2172446-0005 (

PULPROG hmcetcp13nd

TD 4096

TD 4096

hmcetcp13nd

SOLVENT MeOD

NS 16

DS 14

SWH 7812.500 Hz

FIDRES 3.814697 Hz

AQ 0.2621440 sec

RG 101

DW 64.000 usec

DE 28.50 usec

TE 300.2 K

CNSTR6 120.0000000

CNSTR7 170.0000000

CNSTR13 8.0000000

DO 0.0000360 sec

D1 2.0000000 sec

D2 0.0000000 sec

D16 0.0000000 sec

INO 0.0000404 sec

TDav 1

SFO1 600.1330006 MHz

NUC1 1H

F1 11.92 usec

P1 11.92 usec

PLW1 17.1790008 Hz

SFO2 150.978988 MHz

NUC2 13C

P3 11.80 usec

P24 2000.00 usec

PLW2 86.66300201 W

P16 100.00 usec

CNSTR30 0.39815

F1 - Acquisition Parameters

TD 256

SFO1 150.9179 MHz

FIDRES 278.272491 Hz

SW 236.015 ppm

ENCODE Echo-Antiecho

F2 - Processing Parameters

SI 2048

SF 600.1300127 MHz

WDW SINE

SSB 4

LB 0 Hz

PC 1.40

F1 - Processing Parameters

SI 1024

MC2 echo-antiecho

SF 150.9025931 MHz

WDW COSINE

SSB 2

LB 0 Hz

GB 0



HP001

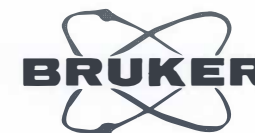

Current Data Parameters  
 NAME Component 3 of  
 Chebulae Fructus\_230401  
 EXPNO 6  
 PROCNO 1

F2 - Acquisition Parameters  
 Date\_ 20231013  
 Time 20.35 h  
 INSTRUM Avance  
 PROBHD Z172446\_0005 (   
 PULPROG hmbcetgp13ad  
 TD 4096  
 SOLVENT MeOD  
 NS 54  
 DS 16  
 SWH 7812.500 Hz  
 FIDRES 3.814697 Hz  
 AQ 0.2621440 sec  
 RG 101  
 DW 64.000 usec  
 DE 6.50 usec  
 TE 298.2 K  
 CNST6 120.0000000  
 CNST7 170.0000000  
 CNST13 8.0000000  
 D0 0.00000300 sec  
 D1 2.00000000 sec  
 D6 0.06250000 sec  
 D16 0.00020000 sec  
 IN0 0.00001404 sec  
 TDAV 1  
 SFO1 600.1330006 MHz  
 NUC1 1H  
 P1 11.92 usec  
 P2 23.84 usec  
 PLW1 17.17900085 W  
 SFO2 150.9178988 MHz  
 NUC2 13C  
 P3 11.80 usec  
 P24 2000.00 usec  
 PLW2 86.66300201 W  
 P16 1000.00 usec  
 CNST30 0.598115

F1 - Acquisition parameters  
 TD 256  
 SFO1 150.9179 MHz  
 FIDRES 278.272491 Hz  
 SW 236.015 ppm  
 FMODE Echo-Antiecho

F2 - Processing parameters  
 SI 2048  
 SF 600.1300127 MHz  
 WDW SINE  
 SSB 4  
 LB 0 Hz  
 GB 0  
 PC 1.40

F1 - Processing parameters  
 SI 1024  
 MC2 echo-antiecho  
 SF 150.9025931 MHz  
 WDW QSINE  
 SSB 2  
 LB 0 Hz  
 GB 0

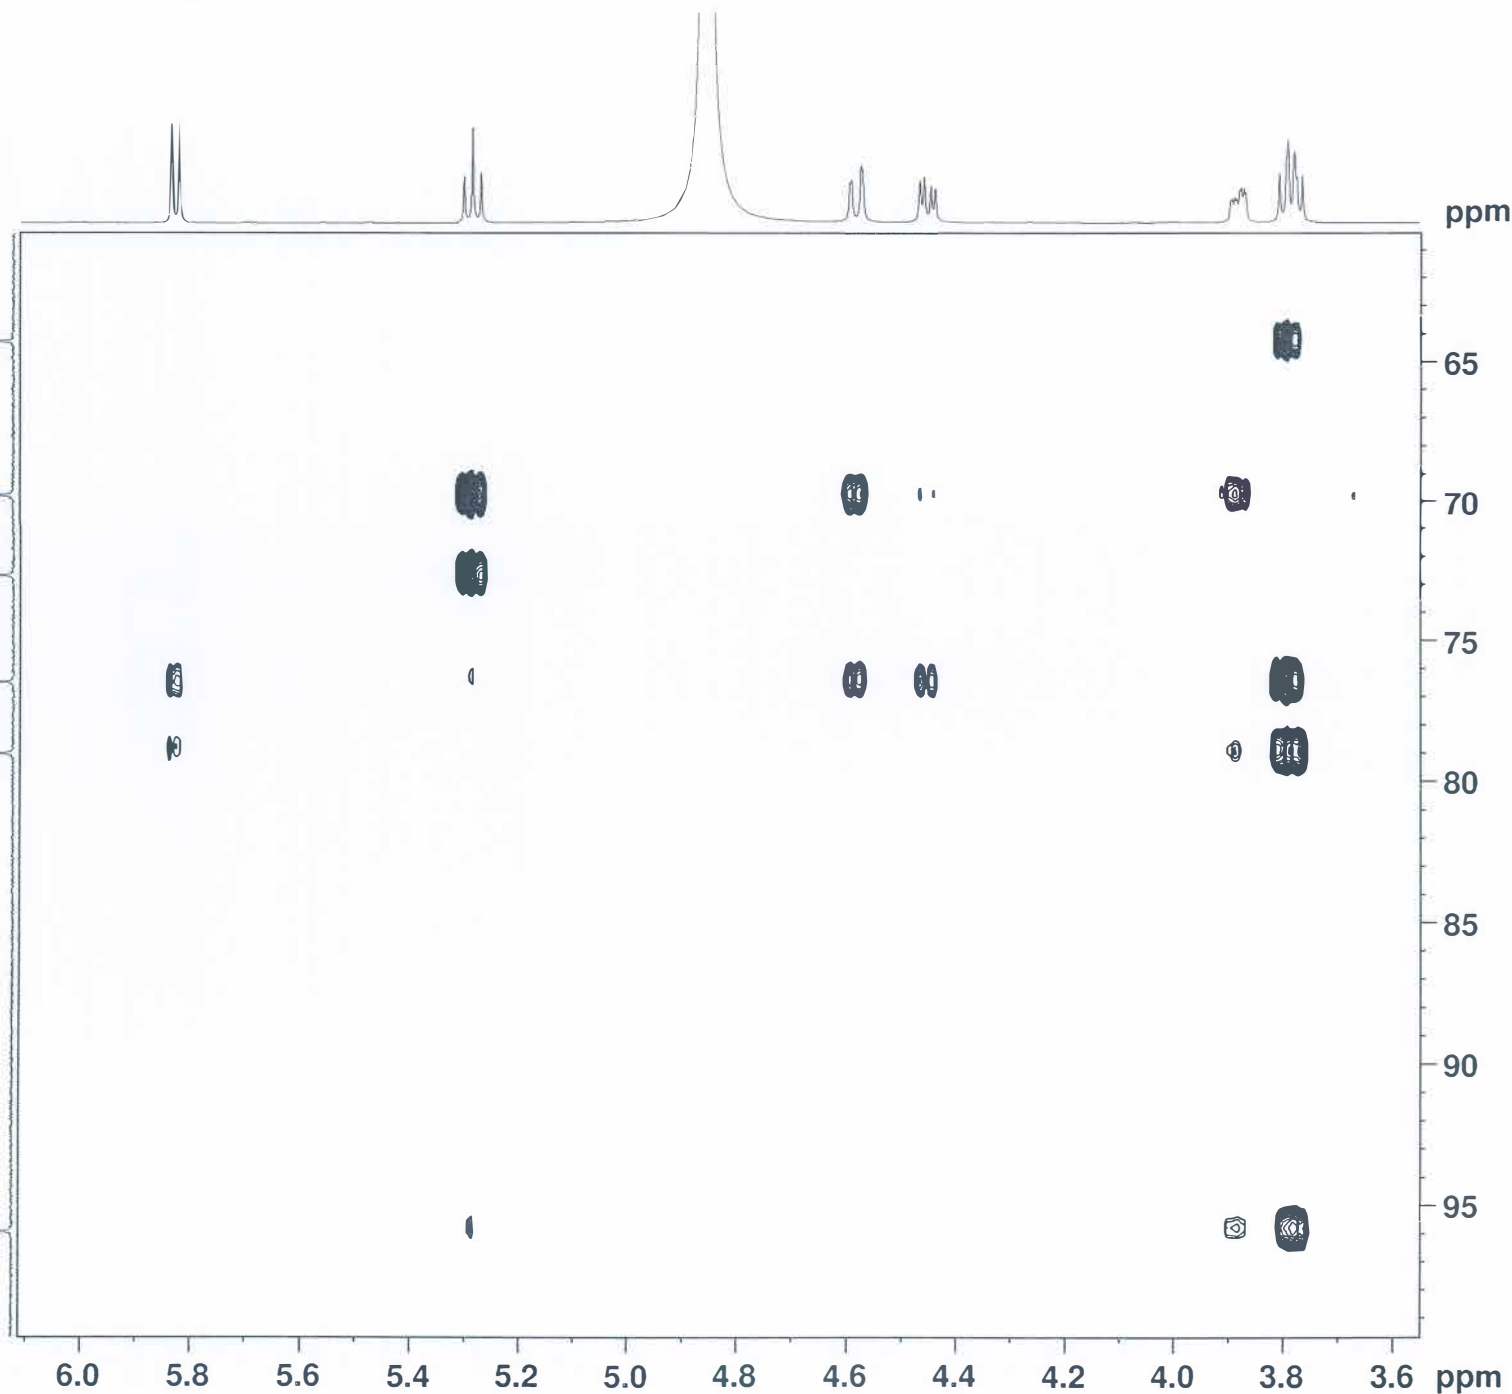

Supplement: s1 [file s1]
